# Supplementary material for: Involving patient research partners has a significant impact on outcomes research: a responsive evaluation of the international OMERACT conferences
Source: PubMed Central journal article supplement — BMJ Open. 2013 May 9;3(5):e002241. doi: 10.1136/bmjopen-2012-002241 (PMC3651970; doi:10.1136/bmjopen-2012-002241), 2013-05-09
Supplement: bmjopen-2012-002241.draft_revisions.pdf [file bmjopen-2012-002241.draft_revisions.pdf]

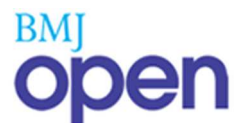

**Involving patient research partners has a significant impact on outcomes research: an example from the international OMERACT conferences.**

|                                 |                                                                                                                                                                                                                                                                                                      |
|---------------------------------|------------------------------------------------------------------------------------------------------------------------------------------------------------------------------------------------------------------------------------------------------------------------------------------------------|
| Journal:                        | <i>BMJ Open</i>                                                                                                                                                                                                                                                                                      |
| Manuscript ID:                  | bmjopen-2012-002241                                                                                                                                                                                                                                                                                  |
| Article Type:                   | Research                                                                                                                                                                                                                                                                                             |
| Date Submitted by the Author:   | 20-Oct-2012                                                                                                                                                                                                                                                                                          |
| Complete List of Authors:       | Wit, Maarten; VU Medical Centre , Metamedica<br>Abma, Tineke; VU Medical Centre, Metamedica<br>Koelewijn-van Loon, Marije; Maastricht University Medical Centre,<br>Department of General Practice<br>Collins, Sarah; Patient Research Partner,<br>Kirwan, John; University of Bristol, Rheumatology |
| <b>Primary Subject Heading</b>: | Rheumatology                                                                                                                                                                                                                                                                                         |
| Secondary Subject Heading:      | Qualitative research                                                                                                                                                                                                                                                                                 |
| Keywords:                       | HEALTH IMPACT ASSESSMENT, QUALITATIVE RESEARCH, RHEUMATOLOGY                                                                                                                                                                                                                                         |
|                                 |                                                                                                                                                                                                                                                                                                      |

SCHOLARONE™  
Manuscripts

## Article Summary

### Article focus

- Since 2002 patients participate as collaborative partners in the biannual conference on Outcome Measures in Rheumatology (OMERACT).
- Although the contribution of patients has constantly been praised and prompted a wide-spread call for scientific publications on the impact of engaging with patients, no systematic obtained evidence has been published to support the idea that structural involvement of patients in research is beneficial.
- Our qualitative study reports the combined results of a thematic document analysis and 38 semi structured interviews with all stakeholders including researchers, patient participants and representatives from pharmaceutical industry and international regulators.

### Key messages

- Long term engagement with arthritis patients in OMERACT conferences has significantly influenced outcome research in the field of rheumatology.
- Patients have successfully contributed to the research agenda of OMERACT by identifying new domains that are important for patients, and provided the patient perspective in the development of core outcome sets and the development of patient reported outcome measures.
- This study demonstrates that patients can play a valuable role as collaborative partners in a scientific conference on outcome research.

### Strengths and limitations of this study

- Triangulation of the combined review of the document analysis and interviews, together with the active involvement of all team members representing a variety of perspectives in the phase of data analysis and interpretation, have enhanced the rigor of the study.
- The unique context of the OMERACT conferences limits the generalizability of the study results and makes comparable evaluation studies recommendable.

## ABSTRACT

Objective – To assess the impact of patients as international research partners by analysis of the inclusion of patients in OMERACT conferences and how this has changed the scope and conduct of outcomes research.

Methods – A thematic content analysis of Outcome Measures in Rheumatology (OMERACT) internal documents, publications and conference proceedings, followed by interviews with 16 patient participants and 16 professional participants from research, pharmaceutical industry and regulatory backgrounds.

Results – The role of patients evolved over 10 years from a single patient focus group to full participation in all areas of the meeting and inclusion in research groups meeting between conferences. Five main categories of impact emerged: widening the research agenda; including patient relevant outcomes in core sets; enhancing patient reported instruments; changing the culture of OMERACT; and consequences outside OMERACT. Patient participants identified previously neglected outcome domains such as fatigue, sleep disturbances and flares which prompted collaborative working on new programmes of research. Specific benefits and challenges for patients and professionals were identified, such as personal fulfilment, widening of research interests, difficulties in establishing equal partnerships, and concerns about loss of research rigour.

Conclusions – Including patients as partners in an international research initiative changes its focus and way of working. For OMERACT it has resulted in new developments in the research agenda and the use of more patient relevant outcomes in clinical trials. These collaborations have changed perceptions and beliefs and led to wider patient involvement as partners in research.

1  
2  
3 Incorporating the patient perspective in health care research is strongly promoted by policy  
4 makers,<sup>1-4</sup> funding bodies and international regulators. Many theoretical benefits from patient  
5 involvement in research have been reported,<sup>5-8</sup> such as improving the relevance of research  
6 questions, improving recruitment of study participants, and increasing chances for funding  
7 and dissemination of results. In addition there is an increasing recognition of the essential role  
8 of patients in outcome research.<sup>9</sup> The FDA has made patient involvement mandatory in the  
9 process of the development of patient reported outcome measures<sup>10 11</sup> and in the context of  
10 COMET (Core Outcome Measures in Effectiveness Trials) patient contributions are seen as  
11 crucial in defining domains that are relevant to include in core outcome sets for clinical  
12 trials.<sup>12</sup> Development of core outcome sets might lead to less variety of incomparable and  
13 inappropriate outcome measures, more patient oriented endpoints and less bias by selective  
14 reporting of only positive or statistically relevant outcomes.<sup>13</sup> Core outcome sets may ease  
15 the work of systematic reviewers in synthesizing the results of multiple studies.<sup>14 15</sup> The  
16 question is however whether these theoretical benefits of patient involvement in outcome  
17 research makes any difference in practice?

18  
19  
20  
21  
22  
23  
24  
25  
26  
27  
28  
29  
30  
31  
32  
33  
34  
35  
36 The international group Outcome Measures in Rheumatology (OMERACT), which  
37 defines core outcome sets in rheumatic diseases, first included patient participants at its 6<sup>th</sup> bi-  
38 annual conference in 2002 and has continued to do so. This provides an opportunity to  
39 analyse the consequences and address the important question of whether patient participation  
40 has resulted in any demonstrable impact on the nature of its research activity.

41  
42  
43  
44  
45  
46  
47 Patient involvement in OMERACT has been presented as a presumed success and the  
48 2002 conference report concluded that “the preliminary success of this forum” was the basis  
49 for “continued and possibly expanded patient participation at the next OMERACT  
50 meeting”.<sup>16</sup> Two conferences later others perceived the involvement of patients as “indicative  
51 of the beginning of a paradigm shift in thinking about RA outcomes over the last 5 years”.<sup>17</sup>  
52  
53  
54  
55  
56  
57  
58  
59  
60

1  
2  
3 Since then OMERACT has formulated three principles recognising the essential role of  
4 patients in outcome research.<sup>18</sup> First, patients' input is indispensable when defining relevant  
5 outcome measures, identifying domains that are important from the perspective of patients,  
6 and assessing feasibility of measurement tools. Second, structural involvement of patients  
7 during the whole research process provides face validity. Third, OMERACT intends "to  
8 ground theoretical discussions in the lived experience of arthritis, and in concepts which can  
9 be readily communicated to patients to help with therapeutic decision making".<sup>18</sup>  
10  
11  
12  
13  
14  
15  
16  
17  
18

19 However, the validity of these arguments has never been substantiated by robust evidence  
20 for the effectiveness of patient participation and it is not clear whether or how this  
21 involvement has influenced methodologies, procedures, attitudes, and research outcomes.  
22 Therefore, the objective of this study is to describe and evaluate the contributions made by  
23 patients since OMERACT started implementing structural patient participation in its  
24 conferences. We review the impact of patients on the research agenda and the development of  
25 patient reported outcomes (PRO's) and explore how including patients has influenced the  
26 culture and structure of the OMERACT conference through the attitudes, beliefs and  
27 perceptions of participants.  
28  
29  
30  
31  
32  
33  
34  
35  
36  
37  
38  
39

## 40 **Method**

41 An initial thematic document analysis was carried out including OMERACT conference  
42 proceedings and 'grey literature' such as correspondence, invitations, session reports, e-mails  
43 and OMERACT policy documents. The review focused on the arguments, reception and  
44 evolution of patient involvement in OMERACT conferences and the contributions made by  
45 patients.  
46  
47  
48  
49  
50  
51  
52

53 Subsequently a responsive evaluation took place during OMERACT 10 (Malaysia, 2010)  
54 using qualitative interviews with representatives of stakeholders. This approach aims to  
55  
56  
57  
58  
59  
60

1  
2  
3 explore different meanings that participants attribute to patient involvement.<sup>19</sup> It samples all  
4 stakeholders and does not seek consensus, but respects different opinions, values and  
5 interests. This ensures that no perspective is omitted as the result of an imbalance of power.  
6  
7

8  
9 The first author held 32 semi-structured interviews before, during and after the  
10 conference (table 1) and included senior (n=10) and junior researchers (n=2), representatives  
11 of pharmacological industry and regulators (n=2), staff (n=2), new patient participants (n=8)  
12 and experienced patient participants (n=8) . The interviewees were invited by e-mail. The  
13 patient participants were aware of the purpose of the study through a one page announcement  
14 in the patient pack that was distributed two weeks in advance of the conference.  
15  
16

17  
18 Twenty-eight interviews were recorded, transcribed by an independent secretariat and  
19 subjected to a responder check. Three interviews were summarized in a report, one interview  
20 took place without protocol and, on request of the interviewee, without recording (PF). One  
21 interview was done through Skype (PP). The average duration of the interviews was 52  
22 minutes, most of them taking place in the humid open lobby of the conference resort. Twenty-  
23 four interviews were held in English of which 6 was not the native language. Eight interviews  
24 were in Dutch.  
25  
26

27  
28 The interview protocols were slightly different for professionals, new patients and  
29 experienced patients. The topics were derived from the thematic document analysis and pilot  
30 interviews with 2 experienced patient participants and 2 researchers (a senior and a junior).  
31 The topics dealt with: the expected role of patient participants; their selection, preparation and  
32 support; and with the expected or provided contribution to the OMERACT conference.  
33  
34

35  
36  
37  
38  
39  
40  
41  
42  
43  
44  
45  
46  
47  
48  
49  
50  
51  
52 *Selection of interviewees* - At OMERACT 10 a total of 172 delegates participated, 152  
53 professionals and 20 patients. Nine patients attended the conference for the first time.

54  
55  
56 Selection of interviewees aimed at maximum variation and followed an emergent purposive  
57  
58  
59  
60

1  
2  
3 sampling approach taking into account stakeholder background, opinion about patient  
4 involvement, gender, geographical spread and number of OMERACT conferences attended.  
5  
6  
7 Except for one patient participant from the hosting country, all interviewees were selected by  
8  
9  
10 the first and last author. Because of the richness of the interviews, and in order to achieve  
11  
12 saturation, extra interviews were held during the conference and seven other interviews took  
13  
14 place within two weeks after the conference.

15  
16 Although 2 interviewees were chosen because of their previously reported criticism of  
17  
18 involving patients, the outcome of the interviews with these professionals was that they  
19  
20 expressed a change in perception of patient involvement in a more positive way. For this  
21  
22 reason 2 more interviews with professionals who had expressed critical comments during the  
23  
24 last conference were arranged. Finally, to ensure the opinions of young investigators, 2  
25  
26 OMERACT Fellows were approached, one undertaking a PhD in translational research and  
27  
28 one post doctoral researcher active in clinical research. In total the perceptions and  
29  
30 experiences of 16 patient participants and 16 professionals were collected (table 1).  
31  
32  
33  
34  
35

36 [insert table 1]  
37  
38  
39

40 *Data-analysis* - A thematic content analysis focused in particular on the reported  
41  
42 contributions attributed to patient participants. Coding of the interviews was done separately  
43  
44 by the first author and an independent second coder (third author) who had never worked with  
45  
46 active patient involvement before. This resulted in 211 detailed codes that were then  
47  
48 combined into 27 sub-categories. During several meetings, the project team, representing  
49  
50 various backgrounds, discussed the codes and subcategories from a variety of perspectives,  
51  
52 and sought natural groupings or categories within the data. Triangulation took place by  
53  
54 synthesizing interview data and results from the document analysis. To increase the relevance  
55  
56  
57  
58  
59  
60

1  
2  
3 and validity of the analysis and interpretation of the data one of the patients who attended  
4  
5 OMERACT 10 for the first time was invited to join the research team. As a patient research  
6  
7 partner<sup>20</sup> she was involved in the coding, data analysis and data interpretation to guarantee  
8  
9 the patient perspective. To protect the anonymity of the participants all quotes are presented in  
10  
11 the “she”-form. Quotes of professional researchers are indicated by ‘R’ and those of patient  
12  
13 research partners (in short: ‘partners’) by ‘P’.

## 18 Results

### 22 Document analysis: History of patient involvement at OMERACT

25 OMERACT started in 1992 as an initiative to overcome the problem of widespread and  
26  
27 inconsistent use of many different outcome measures in rheumatoid arthritis (RA) clinical  
28  
29 trials. The objective was to improve “the accuracy and responsiveness to change of clinically  
30  
31 relevant (to patient and clinician) endpoints”.<sup>21</sup> Rheumatologist from many countries met in  
32  
33 Maastricht and achieved consensus on a core set of outcomes for RA. The RA core set was  
34  
35 endorsed by the WHO.<sup>22</sup> The initial stand alone conference was sufficiently successful that it  
36  
37 was followed by conferences in alternate years continuing the discussion and consensus  
38  
39 building about new core sets for other rheumatic diseases and new measurement instruments.  
40  
41

42  
43 During the fifth OMERACT conference (2000) participants discussed the concept of a  
44  
45 minimum clinically important difference (MCID). Based on methodological arguments a  
46  
47 growing interest in patient reported outcomes emerged, culminating in a spontaneous proposal  
48  
49 at the final session to invite patients to the next conference. All participants voted in favour of  
50  
51 this proposal.<sup>23</sup> The chair of the conference felt confident about the proposal because it had  
52  
53 been discussed in the organising committee before, although no decisions had been taken.  
54  
55 Participants of the MCID module argued that patient perspectives should be explored further  
56  
57  
58  
59  
60



1  
2  
3 <sup>24</sup> and took responsibility for identifying 11 patients to join OMERACT 6 and to review the  
4  
5 RA core set.  
6

7  
8 Our document analysis revealed the unconditional positive reception of patient delegates  
9  
10 at OMERACT conferences, and partners confirmed that concerns regarding their involvement  
11  
12 were misplaced. They felt their reception was extremely welcoming. “There was a tangible  
13  
14 feeling of relief and a belief that patients’ views and opinions would be listened to and  
15  
16 incorporated into the deliberations”.<sup>25</sup> Also the organizers were excited and called the patient  
17  
18 involvement “a tremendous success”.<sup>26</sup>  
19

20  
21 Between 2002 and 2012 a total of 57 partners with different rheumatic diseases have  
22  
23 participated as full delegates with equal voting rights.<sup>27</sup> Their role and contributions have  
24  
25 developed over time. At the first conference (2002) they formed an homogeneous group of  
26  
27 people with RA with little or no experience in scientific research. The level of involvement in  
28  
29 the conference in general was relatively low, support was not organized and the number of  
30  
31 sessions patients attended was limited. Contributions centred on participation in the workshop  
32  
33 discussions about the severity of fatigue and the definition of low disease activity, although  
34  
35 there was a keynote speech at the opening ceremony.<sup>25</sup> In contrast, by OMERACT 11 (2012)  
36  
37 the partners were a heterogeneous group with different rheumatic conditions and different  
38  
39 levels of experience, competences and cultural background. They received a pre-conference  
40  
41 information pack and were actively supported by a pre-conference dinner, a glossary, training  
42  
43 sessions and a buddy system. They carried out a variety of tasks similar to professionals such  
44  
45 as giving plenary presentations, co-chairing breakout sessions, reporting back from breakout  
46  
47 sessions and preparing consensus statements. Several partners became co-authors of peer-  
48  
49 reviewed publications.  
50  
51  
52  
53  
54  
55

## 56 **Interviews: Patient contributions to OMERACT meetings and outcome research**

57  
58  
59  
60

1  
2  
3 Interviewees reported a variety of contributions made by partners during the conference  
4 where they are an integral part of the deliberative and consensus-building process.<sup>18</sup> These  
5 examples are presented below and compared with the document analyses when appropriate.  
6  
7 Because research in the domain of fatigue has been reported as the most illustrative example,  
8 the contributions in this area will be described in more detail. Using the methodology  
9 described above we identified 5 main categories from the comments made during the  
10 interviews with OMERACT participants (Table 2): Contributions to the research agenda; The  
11 development of core sets; The development of patient reported outcomes (PRO's); The  
12 culture of OMERACT; Consequences outside OMERACT. Finally we will highlight some of  
13 the challenges that emerged from the interviews.  
14  
15  
16  
17  
18  
19  
20  
21  
22  
23  
24  
25  
26

27 ***Contributions to the research agenda*** - From the very beginning partners had a significant  
28 influence on the research agenda in the field of rheumatology by participating in OMERACT  
29 workshops and small group discussions. They identified new outcome domains that are  
30 relevant from their perspective.<sup>28</sup> The first Patient Perspective Workshop, attended by 11  
31 patient participants and 41 professionals, focused on the development of “valid outcome  
32 instruments that incorporate the perspective of the patient and to prepare the evidence and  
33 arguments for their inclusion in the (RA) core set”<sup>29</sup>. The preconference paper pointed out the  
34 methodological and political challenges: How to elicit and incorporate preferences of patients  
35 in RCT's?<sup>27</sup> The workshop had been specifically arranged to support the partner  
36 contributions including a pre- and post-workshop meeting. The workshop identified  
37 subjective experiences of RA, not encompassed in the RA core set but important  
38 consequences of the disease: a sense of well being, fatigue, and disturbed sleep.<sup>29</sup>  
39  
40  
41  
42  
43  
44  
45  
46  
47  
48  
49  
50  
51  
52  
53

54 After the first conference attended by partners, it became apparent that perspectives of  
55 professionals and patients differ and more research was needed to articulate patients  
56  
57  
58  
59  
60

1  
2  
3 priorities.<sup>30-33</sup> Partners emphasized the need for an holistic approach to people with arthritis.<sup>25</sup>  
4  
5 The acknowledgement of the discordance of perspectives initiated new studies looking into  
6  
7 the preferences, opinions and experiences of people with rheumatic diseases<sup>34-36</sup> and  
8  
9 developing patient-derived core sets.<sup>37,38</sup> This made participants more aware of the emerging  
10  
11 patient perspective: “the whole realm of things we haven’t looked at” [RA]. New topics  
12  
13 emerged: remission, pain, flares and foot problems. One interviewee clearly stated that  
14  
15 partners “inspired me for new projects to study the variety in new productivity outcome  
16  
17 measures” [RK].  
18  
19

20  
21  
22 ***Case-study of fatigue*** - Since 2002 when partners identified new topics for research, studies  
23  
24 have been initiated with firm involvement of partners in the field of sleep disturbances, flares  
25  
26 and well being. The most progress has been made in fatigue and the emergence of fatigue as a  
27  
28 relevant outcome measure in RA provides an illustrative case history. When asked for the  
29  
30 greatest benefit of including partners in OMERACT conferences interviewees unanimously  
31  
32 confirmed that the topic of fatigue would not have been on the research agenda without  
33  
34 partners expressing their concerns about fatigue as an often neglected symptom of their  
35  
36 disease and without the listening of receptive professionals. One of the partners attending  
37  
38 OMERACT 6 recalled:  
39  
40  
41  
42  
43  
44

45 “I can’t remember who brought up the subject, but someone mentioned fatigue. And that  
46  
47 was the occasion when one of the other delegates said ‘well, everybody gets tired’. One  
48  
49 patient shot to her feet and said ‘no, it’s not, it’s not like anything you’ve ever  
50  
51 experienced; it’s not tiredness; it’s a complete wipe-out’.” [PM]  
52  
53  
54  
55  
56  
57  
58  
59  
60

1  
2  
3 Early descriptions of fatigue at OMERACT 6 and 7 led to substantial qualitative and  
4  
5 quantitative research. The first studies investigated the prevalence and severity of fatigue in  
6  
7 RA and how patients describe their fatigue.<sup>39-42</sup> The next step comprised a systematic review  
8  
9 of measurement instruments for fatigue<sup>43</sup> that explored the rigor of existing measurement  
10  
11 tools and the need to develop patient-derived instruments that are trustworthy, capturing  
12  
13 concepts and language of patients. Furthermore a standardized visual analogue scale,  
14  
15 opportunities for electronic gathering of data and exploring mechanisms of fatigue that could  
16  
17 guide researchers in the development of effective interventions, were added to the research  
18  
19 agenda. New data, presented at OMERACT 8 (2006) showed that fatigue is not a  
20  
21 consequence of RA, but an independent variable that adds new information to the existing RA  
22  
23 core set.<sup>44 45</sup> This new perception resulted in the acceptance of fatigue as an important  
24  
25 outcome for clinical trials.<sup>46 47</sup> Fatigue was subsequently added to the RA core set as a  
26  
27 recommended outcome.  
28  
29  
30

31  
32 More powerful instruments for measuring fatigue in RA have since been devised and  
33  
34 validated, starting from the perspective of the patients.<sup>48 49</sup> Nicklin described precisely the role  
35  
36 and contributions of patients in different phases of the development of patient reported  
37  
38 outcome measures for fatigue, including the influence of a patient research partner providing  
39  
40 practical insights into everyday life with RA at every stage of question development.<sup>50</sup>  
41  
42 Patients made significant contributions in pilot interviews by discussing “measurement  
43  
44 properties of wording, time-frame and descriptors” and articulating different meanings of  
45  
46 words like *cope* and *manage*. Their involvement improved the final data collection and has  
47  
48 also been particularly valuable for developing new intervention programs. Outside  
49  
50 OMERACT other researchers initiated similar studies, focusing on the communication  
51  
52 between patients and health professionals in the consultation room.<sup>51</sup> Based on these new  
53  
54 insights intervention studies are now undertaken where fatigue is the primary endpoint<sup>52 53</sup>.  
55  
56  
57  
58  
59  
60

1  
2  
3 This case-study of fatigue shows that it took more than a decade to develop effective  
4 interventions after identifying a new domain important from the perspective of patients.  
5  
6  
7

8  
9  
10 The thematic document analysis provided additional evidence for the statement that without  
11 patients raising their voice at OMERACT 6 fatigue would not have been high on the research  
12 agenda. The issue of fatigue was not new for rheumatologists.<sup>54-56</sup> Fatigue was a symptom  
13 regularly reported during clinical consultations, but not incorporated in guidelines for  
14 monitoring and managing. Fatigue in ankylosing spondylitis was identified by physicians and  
15 incorporated in a disease status questionnaire.<sup>57</sup> And during OMERACT 3 (1996) delegates  
16 carried out a ranking exercise trying to prioritize psychosocial measures in musculoskeletal  
17 diseases. The discussion groups identified outcomes such as pain, depression, anxiety and  
18 fatigue as major concerns.<sup>58</sup> For fatigue eight examples of measurement instruments were  
19 given.<sup>59</sup> However, after this workshop, nothing happened for six years, until patients raised  
20 the urgency of fatigue as a serious symptom.  
21  
22  
23  
24  
25  
26  
27  
28  
29  
30  
31  
32  
33  
34  
35

36 Retrospectively, professionals admitted they had a blind spot for fatigue in RA and only  
37 hearing from partners at OMERACT made them change their perception of fatigue as an  
38 important outcome:  
39  
40  
41  
42  
43  
44

45 “Because when I was working in oncology before, during university training, of course  
46 we saw that the patients were lying in bed all day and we knew they were exhausted, call  
47 that fatigue. But patients with RA, we were ignorant.” [RC]  
48  
49  
50  
51  
52  
53

54 Another physician, involved in OMERACT from the start:  
55  
56  
57  
58  
59  
60

1  
2  
3 “We were first discussing on fatigue and to be honest: I never ever had before heard of  
4 fatigue being a problem in rheumatology. So it got into my mind and then I got thinking  
5 about it and then, when I was back, I asked patients if they felt fatigue and I got nearly a  
6 100% positive response. So it was like a coming out, you know. I listened to the patients  
7 before but bringing it to a specific topic, that was really what I learned at OMERACT.”  
8

9  
10  
11  
12  
13 [RA]

14  
15  
16  
17  
18 [Insert table 2]  
19  
20  
21  
22

23 ***The development of core sets and patient reported outcomes*** – During the first two  
24 conferences including patients the focus of partners’ contributions was on agenda-setting and  
25 identifying relevant outcomes for clinical trials. Then, partners started contributing by  
26 identifying domains that are relevant for disease-specific core sets for psoriatic arthritis,  
27 fibromyalgia, gout and vasculitis. Furthermore they contributed to the development of core  
28 sets for methodological or clinical concepts like MCID and remission. Partners have played  
29 an important role in the assessment of the feasibility of instruments and core sets, one of the  
30 three key components of the OMERACT Filter.<sup>60</sup>  
31  
32  
33  
34  
35  
36  
37  
38  
39

40 Partners have been helpful in the development of PRO measurement instruments in the  
41 field of work productivity, monitoring adverse events, flares and psychosocial interventions  
42 such as self-management programs. At the 2010 conference, during the plenary session on  
43 flares in RA, one of the partners gave a personal testimony about the devastating impact of the  
44 unpredictable nature of RA. A professional in the audience was surprised and reported: “It  
45 demonstrates that the disease activity fluctuates more than we can see in our data: Our  
46 instruments are more flat, and by the limited frequency of measuring we filter fluctuations  
47 out”. [RI]  
48  
49  
50  
51  
52  
53  
54  
55  
56  
57  
58  
59  
60

1  
2  
3 Although there is a broad consensus that partners have been beneficial in the development  
4 of PRO's, several participants also reported the example of a single partner questioning the  
5 tolerability of MRI scanning times for people with ankylosing spondylitis. During one of the  
6 breakout sessions on imaging she reported not being able to lie still for 35 minutes in an MRI  
7 machine. This alerted the researchers to their assumption that only moving hurts and as a  
8 consequence the proposed scanning recommendations were adjusted to ensure shorter  
9 scanning times. This shows that partners can be helpful in the assessment of the feasibility of  
10 technical outcome measures.  
11  
12  
13  
14  
15  
16  
17  
18  
19  
20

21  
22 Regulators require strong evidence for the effectiveness of new medicines by demonstrating  
23 accurately that they reduce structural progression as well as patient important outcomes. By  
24 doing both of these, developing standards for high quality imaging techniques and exploring  
25 new PRO's and translating them into valid and feasible measures, OMERACT has been  
26 extremely advantageous for the negotiations with regulators about the registration and  
27 relatively generous reimbursement of new biologic agents:  
28  
29  
30  
31  
32  
33  
34  
35  
36  
37

38 "I think, to be really honest, the patient involvement process in OMERACT and the  
39 changes in outcome measurements and the use of them in the drug tests has made a  
40 real difference for so many patients." [RB]  
41  
42  
43  
44  
45  
46  
47  
48

49 ***The culture of OMERACT***– In spite of the initial unanimous vote to invite patients, some  
50 researchers were concerned about changing the layout of the conference:  
51  
52  
53  
54  
55  
56  
57  
58  
59  
60

1  
2  
3 “My original expectation of a limited contribution was based on fear that patients were  
4 not able to transcend their personal experience and to generalize ... new stakeholders  
5 often don’t have knowledge about clinometric.” [RE]  
6  
7  
8  
9

10  
11 In retrospect researchers explained that they deferred to the proposal in order to reflect a core  
12 principle of OMERACT of not immediately rejecting new ideas: “To respect and listen rather  
13 than just react”. [RA]  
14  
15  
16  
17

18 Looking back, professional participants were enthusiastic about the advent of partners  
19 at the conference: “I was impressed by the very good working flow”. [RC] Participants  
20 confirmed that the presence of partners has changed their way of thinking and talking. “They  
21 made my blind spot visible” [RK] and another professional reported:  
22  
23  
24  
25  
26  
27

28  
29 “Now what we have found is, and I changed my view, [be]cause it wasn’t only from  
30 OMERACT. As I got to know more and more patients, I realized, this sounds stupid  
31 because it’s so obvious but it wasn’t obvious to me, that a patient isn’t their disease. A  
32 patient is a person who happens to have a disease. What a big difference. Because if  
33 you’re a person that happens to have a disease, then for example you might have  
34 incredible skills in an area that might be very useful to move a clinical trial forward.  
35 So once I came to that realization then patient involvement becomes an absolutely  
36 obvious and integral part of moving forward.” [RA]  
37  
38  
39  
40  
41  
42  
43  
44  
45  
46  
47  
48

49 Partners improved communication and brought dynamics to the dialogue because they are  
50 motivated and constructive, without a personal agenda. At a conference such as OMERACT,  
51 where the discussion about methodology may become extremely technical, partners reminded  
52 participants of the common goal of the conference by providing a human face of a person  
53  
54  
55  
56  
57  
58  
59  
60



1  
2  
3 living with the condition day by day. Their presence made participants more explicit about the  
4  
5 objectives of sessions and more explanatory about terms and concepts under discussion.  
6  
7 Together with a reduced use of jargon this 'forced' simplification resulted in fewer  
8  
9 misunderstandings for everyone.  
10

11 For some professionals the presence of partners complicated the communication.  
12  
13 Some believed that partners slow down the process because they are not familiar with  
14  
15 technical issues. Others felt disinclined to say what they wanted to out of respect to partners  
16  
17 or hesitated to criticize them. One researcher felt embarrassed in the presence of partners and  
18  
19 put her own expertise aside to keep things simple: "Patients didn't sometimes understand the  
20  
21 objective of the research, which hindered us". [RK] One of the partners admitted that "it is a  
22  
23 thin line between providing input and causing irritation". [PN]  
24  
25  
26  
27  
28

29 An analysis of the responses of patients attending OMERACT for the first time showed that  
30  
31 new partners experienced a significant learning curve and a variety of personal benefits.<sup>61</sup>  
32  
33 Results from this study suggest that in fact all participants learned from the contact with other  
34  
35 stakeholders. During this process participants gained trust, respect and understanding,  
36  
37 reflecting the emergence of relational empowerment.  
38  
39  
40  
41

42 "Patients were a kind of sparring partner when I entered a relatively new area. That  
43  
44 was fun and did clarify a lot". [RK]  
45  
46  
47  
48

49 Relational empowerment in the context of health research can be understood as a process in  
50  
51 which traditional doctor-patient relationships transform into equal partnerships enabling  
52  
53 mutual learning processes.<sup>62</sup> All participants become stronger by sharing knowledge and  
54  
55 responsibilities, and educating and helping each other.  
56  
57  
58  
59  
60

1  
2  
3 The reported benefits were easiest to identify at the beginning when the level of  
4 involvement was still low. They became more diffuse when partners were structurally  
5 involved as full and equal collaborators. One interviewee mentioned “a reality check” as an  
6 important benefit of partners attending the conference. For professionals it offered the  
7 opportunity to check the relevance of the scope of their research: Are we doing the right  
8 things according to patients and are we using the right tools and methods? It is a belief of  
9 professionals that this kind of feedback is important to legitimize their research and, together  
10 with the belief of partners that without this research no innovations will take place, it  
11 strengthened the mutual empowerment of both.  
12  
13  
14  
15  
16  
17  
18  
19  
20  
21  
22  
23  
24

25 ***Consequences outside OMERACT*** – The lessons learnt at OMERACT were noticed by the  
26 outside world. Partners returning home after the conference have continued introducing  
27 patient participation in local and national research projects or established networks of patient  
28 research partners.<sup>63-66</sup> Some delegates published a working framework for incorporating the  
29 patient perspective in outcome research.<sup>67</sup> With the input from several OMERACT  
30 participants the European League Against Rheumatism (EULAR) developed  
31 recommendations for the inclusion of patient representatives in scientific projects.<sup>20</sup>  
32 Following these recommendations a new patient reported quality of life instrument for RA  
33 was developed and validated.<sup>37 68</sup> Based on the experiences of OMERACT the organizing  
34 committee of the 6<sup>th</sup> International Shared Decision Making conference decided in 2011 to  
35 invite patient participants.<sup>69</sup> In the same year OMERACT delegates, partners as well as  
36 professionals, participated in the 2<sup>nd</sup> Core Outcome Measures in Effectiveness Trials  
37 (COMET) conference, demonstrating how the OMERACT methodology can be utilized in  
38 other disease areas.<sup>12</sup>  
39  
40  
41  
42  
43  
44  
45  
46  
47  
48  
49  
50  
51  
52  
53  
54  
55  
56  
57  
58  
59  
60

1  
2  
3 ***Remaining challenges emerging from the interviews*** – The role and contribution of patient  
4 participants have changed over time and procedures for patient selection and support have  
5 been developed in order to identify patient participants who are able to make a difference.  
6  
7  
8  
9  
10 There is still a debate going on whether patients should be selected through strict criteria such  
11 as education, communication skills, attitude and familiarity with scientific research. Some  
12 argue that an expert meeting like OMERACT needs expert patients who have extended  
13 knowledge about methodologies of outcome research, and are able to provide a kind of  
14 aggregated patient input. At OMERACT this group represents a minority of delegates, who  
15 are reluctant to allocate the same rights and power to partners as to the professionals. The vast  
16 majority believes that many patients are able to contribute to an OMERACT conference and  
17 emphasizes that a heterogeneous group of partners in age, gender, condition, experience and  
18 cultural background are advantageous for the conference. They intend to develop full  
19 representative participation in all phases of research by including partners in working group  
20 activities between conferences. Finally, some participants point out the potential risks of  
21 partners who become too experienced. They appreciate the naive input as a patient, with a  
22 minimum of preparation and reflection. They assume that as soon as you start thinking about  
23 your contribution, you lose the unique, individual perspective and become a patient-expert  
24 who aligns too easily with professionals.  
25  
26  
27  
28  
29  
30  
31  
32  
33  
34  
35  
36  
37  
38  
39  
40  
41  
42

43 Professionals shared the opinion that partners need training, although they reported  
44 different ideas about the content and aims of such training. Experienced partners as well as  
45 novice researchers felt that any new participant has to learn the OMERACT objectives,  
46 culture and procedures first, before they can become fully productive, mostly at the second or  
47 third conference. This accords with the expectations of partners who attended OMERACT for  
48 the first time.<sup>61</sup>  
49  
50  
51  
52  
53  
54  
55  
56  
57  
58  
59  
60

### Overview of findings

These results show that a decade of patient involvement has been successful and had a significant impact on various aspects of outcome research. Perspectives of patients are different from those of health professionals. Broad consensus exists that partners at OMERACT have played a vital role in identifying domains relevant from the perspective of patients and in developing new PROs such as fatigue, sleep quality, flares and work productivity. Especially in the area of fatigue we have shown that patient involvement on different levels and in different phases improves the quality of outcome research. By combining evidence-based knowledge of researchers and the experiential knowledge of patients, a synthesis of both kinds of knowledge has been achieved and documented. The benefits are assessment tools that accurately measure what really matters to patients, are formulated in understandable language and are user-friendly. Other benefits go beyond improving clinical outcome research and include improved communication, mutual empowerment, changed attitudes and substantial consequences outside OMERACT.

### Discussion

We set out to describe and evaluate the contribution of patients as partners in outcome research, reviewing their impact on the research agenda in rheumatology and the culture and process of the OMERACT conference. The document analysis provided the recorded facts while the interviews allowed an exploration of intentions and attitudes. Since validated methodologies for measuring impact of including new stakeholders in the context of research are lacking, a responsive interview methodology seemed to be a good approach. However, there are several limitations involved in this methodology. First, this responsive study presents an ‘insider’ perspective of patient contributions. There is a strong belief within OMERACT that patient participation works, a belief that is nourished by the world-wide

1  
2  
3 transition towards patient-oriented health care and health research.<sup>70-72</sup> The assumption  
4  
5 however that long term involvement of patients as equal partners guarantees sustainable  
6  
7 inclusion of the patient perspective in outcome research complicates the evaluation process  
8  
9 and makes it difficult to distinguish between expected, perceived and actual contributions.  
10  
11 Many participants, not only partners, but also young researchers and other new-comers, are  
12  
13 ignorant about their own contribution and may not see how their input is reflected in the final  
14  
15 outcomes. Partners reported almost unanimously not being able to confirm substantial  
16  
17 contributions during their participation but they believed they did. More experienced  
18  
19 participants, mostly professionals, were less reluctant in reporting illustrative examples of  
20  
21 patient contributions.  
22  
23

24  
25 Second, in a dialogue and consensus-based conference such as OMERACT many factors  
26  
27 contribute to the final outcomes. We found that when the level of involvement increased from  
28  
29 consultation to collaboration, it became harder to attribute individual or group contributions in  
30  
31 the final outcomes. Collaboration is a dynamic phenomenon and although the breakout  
32  
33 sessions are the main body of the OMERACT conference, a lot of work is done before, after  
34  
35 and between the formal conference sessions. Since tasks are equally performed by patients as  
36  
37 by any other participant, the dialogue between patients and professionals takes place not only  
38  
39 during the official program, but in all parts of the conference. The corridors are quite  
40  
41 important in this respect. Because neither partners nor professionals act as a representative of  
42  
43 any particular group or constituency it remains difficult to determine the influence of  
44  
45 particular individuals in that process.  
46  
47

48  
49 Finally, we assume that experiential knowledge, hidden in anecdotal stories, does have an  
50  
51 impact that is often not claimed by patients nor perceived by professionals. Personal  
52  
53 comments are normally not reported because they are not seen as a valuable and valid source  
54  
55 of knowledge<sup>73</sup> and yet clear documentation of meetings is required to ensure that patients'  
56  
57  
58  
59  
60

1  
2  
3 contributions become visible.<sup>74</sup> Professionals focus on synthesizing data and may not notice  
4  
5 that the dialogue with patients works like a reality check, generates new ideas or changes their  
6  
7 beliefs, behaviour or perception. When partners appear to simply agree with the results  
8  
9 presented at OMERACT it might look as if they do not have any contribution to make, but in  
10  
11 fact they confirm the value of the work under discussion and provide face validity to the  
12  
13 process. It is for this reason that most professionals appreciate the feedback and input from  
14  
15 partners, although not all are aware of this reason. Realizing the importance of such a reality  
16  
17 check is beneficial for the management of realistic expectations: do not expect innovative  
18  
19 ideas, brilliant suggestions and new concepts when inviting partners to join research. Their  
20  
21 contributions are often more subtle and need the attention of a modest and committed  
22  
23 researcher to be noticed.  
24  
25

26  
27 Despite these limitations, we believe that the results presented in this study are relevant  
28  
29 and valid. Through an approach of responsive evaluation reliable answers have been obtained.  
30  
31 No signals were identified to suggest that interviewees have simply given desirable answers,  
32  
33 or just been friendly to the interviewer. Some interviewees have been rather critical, reporting  
34  
35 several barriers for structural involvement of patients in research, but have always added  
36  
37 constructive suggestions for improvement. Lessons learnt regarding the conditions for  
38  
39 successfully engagement with patients will be published separately.<sup>75</sup> However, it is  
40  
41 undeniable that within OMERACT there is a growing belief that patient involvement has been  
42  
43 successful and brought a unique added value to the conference. Even those who were  
44  
45 originally among the most skeptical participants now report that they have changed their  
46  
47 perception about the expected contribution of patient research partners.  
48  
49

50  
51 This study is conducted within the context of a scientific research conference in the field  
52  
53 of rheumatology, a long term somatic condition. Our ability to generalize the findings is  
54  
55 therefore limited and extrapolation to other research contexts or to other conditions should be  
56  
57  
58  
59  
60

1  
2  
3 done with care. In the COMET-initiative<sup>12</sup> health researchers try to develop a validated  
4 methodology for defining core outcome sets for clinical trials in all disease areas and can  
5 learn from the experiences of OMERACT.  
6  
7  
8  
9

### 10 11 **Funding**

12  
13 Funded by EULAR (European League Against Rheumatism) and OMERACT.  
14  
15

### 16 17 **Competing Interests**

18  
19 For the work reported in this manuscript the first author has received a EULAR/OMERACT  
20 bursary to attend OMERACT 10. No financial support from commercial sources has been  
21 received by the authors.  
22  
23

### 24 25 **Contributorship**

26  
27 All authors have been involved in the process of data analysis and interpretation, and have  
28 equally contributed to the writing of this manuscript.  
29  
30

### 31 32 **Data Sharing**

33  
34 No additional data are available.  
35  
36  
37  
38  
39  
40  
41  
42  
43  
44  
45  
46  
47  
48  
49  
50  
51  
52  
53  
54  
55  
56  
57  
58  
59  
60

## References

1. Keizer B, Bless R. Pilot study on the position of health consumer and patients' organisations in seven EU countries. Den Haag: ZonMW, 2010:54.
2. Involve. People & participation; How to put citizens at the heart of decision-making. London: Beacon Press, 2005.
3. Staley K. Summary Exploring Impact: Public involvement in NHS, public health and social care research. Eastleigh.: INVOLVE, 2009.
4. Wright MT, Roche B, von Unger H, Block M, Gardner B. A call for an international collaboration on participatory research for health. *Health Promot Int* 2010;25(1):115-22.
5. Abma TA. Patients as partners in a health research agenda setting: the feasibility of a participatory methodology. *Eval Health Prof* 2006;29(4):424-39.
6. Abma TA, Nierse C, Widdershoven G. Patients as partners in responsive research: methodological notions for collaborations in mixed research teams. *Qualitative Health Research* 2009;19(3):401-15.
7. Abma TA, Broerse JE. Patient participation as dialogue: setting research agendas. *Health Expect* 2010;13(2):160-73.
8. Caron-Flinterman JF, Broerse JE, Bunders JF. The experiential knowledge of patients: a new resource for biomedical research? *Soc Sci Med* 2005;60(11):2575-84.
9. Staniszewska S, Haywood KL, Brett J, Tutton L. Patient and public involvement in patient-reported outcome measures: evolution not revolution. *Patient* 2012;5(2):79-87.
10. Speight J, Barendse SM. FDA guidance on patient reported outcomes. *BMJ* 2010;340:c2921.
11. Rowen D, Carlton J, Brazier JE, Mulhern B, Palfreyman S, Stevens K, et al. FDA on PROMs. Two important points. *BMJ* 2010;341:c5454.
12. Williamson PR, Altman DG, Blazeby JM, Clarke M, Gargon E. The COMET (Core Outcome Measures in Effectiveness Trials) Initiative. *Trials* 2011;12 (Suppl 1)(A70).
13. Clarke M. Standardising outcomes for clinical trials and systematic reviews. *Trials* 2007;8:39.
14. Sinha IP, Smyth RL, Williamson PR. Using the Delphi technique to determine which outcomes to measure in clinical trials: Recommendations for the future based on a systematic review of existing studies. *PLoS Med* 2011;8(1).



- 1  
2  
3 15. Williamson P, Clarke M. The COMET (Core Outcome Measures in Effectiveness Trials)  
4 Initiative: Its Role in Improving Cochrane Reviews. *Cochrane Database Syst Rev*  
5 2012;5:ED000041.  
6  
7
- 8 16. Saag KG. OMERACT 6 brings new perspectives to rheumatology measurement research.  
9 *J Rheumatol* 2003;30(4):639-41.  
10
- 11 17. Heller JE, Shadick NA. Outcomes in rheumatoid arthritis: incorporating the patient  
12 perspective. *Current Opinion in Rheumatology* 2007;19(2):101-05.  
13
- 14 18. OMERACT. Guiding principles for patient research partner participation in OMERACT,  
15 2011.  
16
- 17 19. Abma TA, Widdershoven GAM. Evaluation as a relationally responsible practice. In:  
18 Denzin N, Lincoln Y, editors. *Handbook for Qualitative Inquiry*. California: SAGE  
19 Publications Ltd., 2011.  
20
- 21 20. de Wit MPT, Berlo SE, Aanerud GJ, Aletaha D, Bijlsma JW, Croucher L, et al. European  
22 League Against Rheumatism recommendations for the inclusion of patient  
23 representatives in scientific projects. *Annals of the rheumatic diseases*  
24 2011;70(5):722-6.  
25  
26
- 27 21. Tugwell P, Boers M. OMERACT conference on outcome measures in rheumatoid arthritis  
28 clinical trials: introduction. *J Rheumatol* 1993;20(3):528-30.  
29
- 30 22. Brooks PM, Boers M, Tugwell P. OMERACT III: the "ACT" revisited. *Jrn of Rheum*  
31 1997;24(4):764-5.  
32
- 33 23. Wells G, Anderson J, Beaton D, Bellamy N, Boers M, Bombardier C, et al. Minimal  
34 clinically important difference module: summary, recommendations, and research  
35 agenda. *J Rheumatol* 2001;28(2):452-4.  
36
- 37 24. Kirwan JR, Carr A, Gluck O, Hewlett S. Proposal for inclusion of a 'Patient's  
38 perceptions' module in OMERACT VI [unpublished], 2000.  
39
- 40 25. Quest E, Aanerud GJ, Kaarud S, Collins S, Leong A, Smedeby B, et al. Patients'  
41 perspective. *J Rheumatol* 2003;30(4):884-5.  
42  
43
- 44 26. Brooks PM, Tugwell P, Strand C, Simon L, Boers M. OMERACT 6: International  
45 consensus conference on outcome measures in rheumatology: Introduction. *Jrn of*  
46 *Rheum* 2003;30(4):866-7.  
47  
48
- 49 27. Kirwan J. The patient perspective workshop at OMERACT 6: Rationale and methodology  
50 [unpublished preconference paper]. 2002.  
51  
52  
53  
54  
55  
56  
57  
58  
59  
60

- 1  
2  
3 28. Tugwell P, Boers M, Brooks P, Simon L, Strand V, Idzerda L. OMERACT: an  
4 international initiative to improve outcome measurement in rheumatology. *Trials*  
5 2007;8:38.  
6  
7  
8 29. Kirwan J, Heiberg T, Hewlett S, Hughes R, Kvien T, Ahlmen M, et al. Outcomes from the  
9 Patient Perspective Workshop at OMERACT 6. *Journal of Rheumatology*  
10 2003;30(4):868-72.  
11  
12 30. Hewlett SA. Patients and clinicians have different perspectives on outcomes in arthritis. *J*  
13 *Rheumatol* 2003;30(4):877-9.  
14  
15 31. Leeb BF, Sautner J, Leeb BA, Fassel C, Rintelen B. Lack of agreement between patients'  
16 and physicians' perspectives of rheumatoid arthritis disease activity changes. *Scand J*  
17 *Rheumatol* 2006;35(6):441-6.  
18  
19 32. Kvien TK, Heiberg T. Patient perspective in outcome assessments--perceptions or  
20 something more? *J Rheumatol* 2003;30(4):873-6.  
21  
22 33. Carr A, Hewlett S, Hughes R, Mitchell H, Ryan S, Carr M, et al. Rheumatology  
23 outcomes: the patient's perspective. *Journal of Rheumatology* 2003;30(4):880-3.  
24  
25 34. Ahlmen M, Nordenskiöld U, Archenholtz B, Thyberg I, Ronnqvist R, Linden L, et al.  
26 Rheumatology outcomes: the patient's perspective. A multicentre focus group  
27 interview study of Swedish rheumatoid arthritis patients. *Rheumatology (Oxford)*  
28 2005;44(1):105-10.  
29  
30 35. Hewlett S, Carr M, Ryan S, Kirwan J, Richards P, Carr A, et al. Outcomes generated by  
31 patients with rheumatoid arthritis: how important are they? *Musculoskeletal Care*  
32 2005;3(3):131-42.  
33  
34 36. Rupp I, Boshuizen HC, Roorda LD, Dinant HJ, Jacobi CE, van den Bos G. Course of  
35 patient-reported health outcomes in rheumatoid arthritis: comparison of longitudinal  
36 and cross-sectional approaches. *J Rheumatol* 2006;33(2):228-33.  
37  
38 37. Gossec L, Paternotte S, Aanerud GJ, Balanescu A, Boumpas DT, Carmona L, et al.  
39 Finalisation and validation of the rheumatoid arthritis impact of disease score, a  
40 patient-derived composite measure of impact of rheumatoid arthritis: a EULAR  
41 initiative. *Annals of the Rheumatic Diseases* 2011;70(6):935-42.  
42  
43 38. Hewlett S, Cockshott Z, Almeida C, Richards P, Lowe R, Greenwood R, et al. Sensitivity  
44 to change of the Rheumatoid Arthritis Self-Efficacy scale (RASE) and predictors of  
45 change in self-efficacy. *Musculoskeletal Care* 2008;6(1):49-67.  
46  
47  
48  
49  
50  
51  
52  
53  
54  
55  
56  
57  
58  
59  
60

- 1  
2  
3 39. Hewlett S, Cockshott Z, Byron M, Kitchen K, Tipler S, Pope D, et al. Patients' perceptions  
4 of fatigue in rheumatoid arthritis: overwhelming, uncontrollable, ignored. *Arthritis*  
5 *Rheum* 2005;53(5):697-702.  
6  
7  
8 40. Rupp I, Boshuizen HC, Jacobi CE, Dinant HJ, van den Bos GA. Impact of fatigue on  
9 health-related quality of life in rheumatoid arthritis. *Arthritis Rheum* 2004;51(4):578-  
10 85.  
11  
12 41. Repping-Wuts H, Uitterhoeve R, van Riel P, van Achterberg T. Fatigue as experienced by  
13 patients with rheumatoid arthritis (RA): A qualitative study. *Intl J Nursing Studies*  
14 2008;8(45 (7)):995-102.  
15  
16  
17 42. Nikolaus S, Bode C, Taal E, van de Laar MA. Four different patterns of fatigue in  
18 rheumatoid arthritis patients: results of a Q-sort study. *Rheumatology*  
19 2010;49(11):2191-9.  
20  
21  
22 43. Hewlett S, Hehir M, Kirwan JR. Measuring fatigue in rheumatoid arthritis: a systematic  
23 review of scales in use. *Arthritis & Rheumatism* 2007;57(3):429-39.  
24  
25  
26 44. Kirwan JR, Hewlett S. Patient perspective: reasons and methods for measuring fatigue in  
27 rheumatoid arthritis. *J Rheumatol* 2007;34(5):1171-3.  
28  
29  
30 45. Hewlett S, Chalder T, Choy E, Cramp F, Davis B, Dures E, et al. Fatigue in rheumatoid  
31 arthritis: time for a conceptual model. *Rheumatology (Oxford)* 2010.  
32  
33 46. Kirwan JR, Minnock P, Adebajo A, Bresnihan B, Choy E, de Wit M, et al. Patient  
34 perspective: fatigue as a recommended patient centered outcome measure in  
35 rheumatoid arthritis. *J Rheumatol* 2007;34(5):1174-7.  
36  
37  
38 47. Pincus T, Sokka T. Complexities in the quantitative assessment of patients with rheumatic  
39 diseases in clinical trials and clinical care. *Clin Exp Rheumatol* 2005;23(5 Suppl  
40 39):S1-9.  
41  
42  
43 48. Nicklin J, Cramp F, Kirwan J, Greenwood R, Urban M, Hewlett S. Measuring fatigue in  
44 rheumatoid arthritis: A cross-sectional study to evaluate the Bristol Rheumatoid  
45 Arthritis Fatigue Multi-Dimensional questionnaire, visual analog scales, and  
46 numerical rating scales. *Arthritis Care Res (Hoboken)* 2010;62(11):1559-68.  
47  
48  
49 49. Nikolaus S, van de Laar MA. Measuring fatigue in rheumatoid arthritis. *Nat Rev*  
50 *Rheumatol* 2011;7(10):562-4.  
51  
52  
53 50. Nicklin J, Cramp F, Kirwan J, Urban M, Hewlett S. Collaboration with patients in the  
54 design of patient-reported outcome measures: Capturing the experience of fatigue in  
55 rheumatoid arthritis. *Arthritis Care & Research* 2010;62(11):1552-8.  
56  
57  
58  
59  
60

- 1  
2  
3 51. Repping-Wuts H. Fatigue in patients with rheumatoid arthritis. Nijmegen University, 2009  
4 (thesis).  
5  
6 52. Hewlett S, Ambler N, Almeida C, Cliss A, Hammond A, Kitchen K, et al. Self-  
7 management of fatigue in rheumatoid arthritis: a randomised controlled trial of group  
8 cognitive-behavioural therapy. *Annals of the rheumatic diseases* 2011;70(6):1060-7.  
9  
10 53. Dures E, Kitchen K, Almeida C, Ambler N, Cliss A, Hammond A, et al. "They didn't tell  
11 us, they made us work it out ourselves": Patient perspectives of a cognitive-  
12 behavioural programme for rheumatoid arthritis fatigue. *Arthritis care & research*  
13 2011.  
14  
15 54. Wolfe F, Hawley DJ, Wilson K. The prevalence and meaning of fatigue in rheumatic  
16 disease. *The Journal of rheumatology* 1996;23(8):1407-17.  
17  
18 55. Tack BB. Fatigue in rheumatoid arthritis. Conditions, strategies, and consequences.  
19 *Arthritis Care & Research* 1990;3(2):65-70.  
20  
21 56. Crosby LJ. Factors which contribute to fatigue associated with rheumatoid arthritis. *J Adv*  
22 *Nurs* 1991;16(8):974-81.  
23  
24 57. Garrett S, Jenkinson T, Kennedy LG, Whitelock H, Gaisford P, Calin A. A new approach  
25 to defining disease status in ankylosing spondylitis: the Bath Ankylosing Spondylitis  
26 Disease Activity Index. *The Journal of rheumatology* 1994;21(12):2286-91.  
27  
28 58. Newman SP. Psychosocial measures in musculoskeletal trials. *J Rheumatol*  
29 1997;24(5):979-84.  
30  
31 59. Brooks P, McFarlane AC, Newman S, Rasker JJ. Psychosocial measures. *J Rheumatol*  
32 1997;24(5):1008-11.  
33  
34 60. Boers M, Brooks P, Strand CV, Tugwell P. The OMERACT filter for Outcome Measures  
35 in Rheumatology. *The Journal of rheumatology* 1998;25(2):198-9.  
36  
37 61. de Wit MPT, Koelewijn-van Loon MS, Collins S, Abma TA, Kirwan JR. How patients  
38 contribute a new voice at a scientific conference: their expectations and experiences at  
39 the Outcome Measures in Rheumatology Conference 2010. (submitted) 2012.  
40  
41 62. Abma TA, Nierse CJ, Widdershoven GA. Patients as partners in responsive research:  
42 methodological notions for collaborations in mixed research teams. *Qual Health Res*  
43 2009;19(3):401-15.  
44  
45 63. Kjekken I, Ziegler C, Skrolsvik J, Bagge J, Smedslund G, Tovik A, et al. How to develop  
46 patient-centered research: some perspectives based on surveys among people with  
47 rheumatic diseases in Scandinavia. *Physical Therapy* 2010;90(3):450-60.  
48  
49  
50  
51  
52  
53  
54  
55  
56  
57  
58  
59  
60

- 1  
2  
3 64. Akerhielm CE. Patient participation in research - A Swedish model. *EULAR congress -*  
4 *Session patient priorities in medical & social research [abstract PAR0011].*  
5 *Copenhagen, 2009.*  
6  
7  
8 65. Akerhielm CE. Patient research partners - A way to participation and influence in  
9 research. *EULAR congress - Session patient information and education [abstract*  
10 *PARE0001]. Rome, 2010.*  
11  
12 66. Hewlett S. Learnings from the Bristol experience - Practicalities of a decade of patient  
13 involvement in research on a local level. *EULAR congress - Session patient*  
14 *participation in research [abstract SP0095]. Rome: 2010.*  
15  
16 67. Hewlett S, De Wit M, Richards P, Quest E, Hughes R, Heiberg T, et al. Patients and  
17 professionals as research partners: challenges, practicalities, and benefits. *Arthritis &*  
18 *Rheumatism* 2006;55(4):676-80.  
19  
20 68. Gossec L, Dougados M, Rincheval N, Balanescu A, Boumpas DT, Canadello S, et al.  
21 Elaboration of the preliminary Rheumatoid Arthritis Impact of Disease (RAID) score:  
22 a EULAR initiative. *Annals of the Rheumatic Diseases* 2009;68(11):1680-5.  
23  
24 69. Stiggelbout AM, Weijden TV, Wit MP, Frosch D, Legare F, Montori VM, et al. Shared  
25 decision making: really putting patients at the centre of healthcare. *BMJ*  
26 2012;344:e256.  
27  
28 70. Beresford P. User involvement, research and health inequalities: developing new  
29 directions. *Health Soc Care Community* 2007;15(4):306-12.  
30  
31 71. Ward PR, Thompson J, Barber R, Armitage CJ, Boote JD, Cooper CL, et al. Critical  
32 perspectives on 'consumer involvement' in health research: Epistemological  
33 dissonance and the know-do gap. *Journal of Sociology* 2009;46(1):63-82.  
34  
35 72. Lindenmeyer A, Hearnshaw H, Sturt J, Ormerod R, Aitchison G. Assessment of the  
36 benefits of user involvement in health research from the Warwick Diabetes Care  
37 Research User Group: a qualitative case study. *Health Expectations* 2007;10(3):268-  
38 77.  
39  
40 73. Schipper K. Patient participation & knowledge [thesis]. VU University, 2011.  
41  
42 74. Jinks C, Ong BN, O'Neill TJ. The Keele community knee pain forum: action research to  
43 engage with stakeholders about the prevention of knee pain and disability. *BMC*  
44 *Musculoskelet Disord* 2009;10:85.  
45  
46 75. de Wit MPT, Abma TA, Koelewijn-van Loon M, Collins S, Kirwan J. Facilitating and  
47 inhibiting factors for long term involvement of patients in outcome research - Lessons  
48 learned from a decade of collaboration at OMERACT conferences. (*submitted*) 2012.  
49  
50  
51  
52  
53  
54  
55  
56  
57  
58  
59  
60

1  
2  
3  
4  
5  
6  
7  
8  
9  
10  
11  
12  
13  
14  
15  
16  
17  
18  
19  
20  
21  
22  
23  
24  
25  
26  
27  
28  
29  
30  
31  
32  
33  
34  
35  
36  
37  
38  
39  
40  
41  
42  
43  
44  
45  
46  
47  
48  
49  
50  
51  
52  
53  
54  
55  
56  
57  
58  
59  
60

For peer review only

Table 1 Characteristics interviewees

|                                             | Professionals                                                                                                           | Patient Research Partners                                                                       | Interview Code                                        |
|---------------------------------------------|-------------------------------------------------------------------------------------------------------------------------|-------------------------------------------------------------------------------------------------|-------------------------------------------------------|
| Sex (M:F)                                   | 12 : 4                                                                                                                  | 7 : 9                                                                                           |                                                       |
| Professional background or Diagnosis        | 10 practicing rheumatologists<br>3 full time researchers<br>3 other professionals                                       | 10 rheumatoid arthritis<br>2 vasculitis<br>2 ankylosing spondylitis<br>1 fibromyalgia<br>1 gout |                                                       |
| Number of OMERACT conferences attended      | 1<br>2<br>3<br>4<br>≥5                                                                                                  | 5<br>0<br>1<br>4<br>6                                                                           | 8<br>3<br>1<br>4<br>0<br>PA to PF, PO, PP<br>PG to PN |
| Interview in relation to OMERACT conference | Before<br>During<br>After                                                                                               | 2<br>8<br>6                                                                                     | 1<br>16<br>5                                          |
| Geographical spread                         | 6 countries<br>2 continents                                                                                             | 7 countries<br>4 continents                                                                     |                                                       |
| Research Background                         | 10 Senior Researchers<br>1 Research Fellow<br>1 Post-doctoral researcher<br>2 Pharma representatives<br>2 Staff members |                                                                                                 | RA to RG, RJ, RK, RY<br>RH<br>RI<br>DA, DD<br>DB, DC  |

Table 2

Main and sub-categories from the analysis of patient contributions to OMERACT meetings and outcome research since 2002

| IMPACT OF A DECADE OF PATIENT INVOLVEMENT IN OMERACT                                                                                                                                                                     |                                                                                                                                                                                                                                                                                   |                                                                                                                                                                                                                                 |                                                                                                                                                                                                    |                                                                                                                                                                            |
|--------------------------------------------------------------------------------------------------------------------------------------------------------------------------------------------------------------------------|-----------------------------------------------------------------------------------------------------------------------------------------------------------------------------------------------------------------------------------------------------------------------------------|---------------------------------------------------------------------------------------------------------------------------------------------------------------------------------------------------------------------------------|----------------------------------------------------------------------------------------------------------------------------------------------------------------------------------------------------|----------------------------------------------------------------------------------------------------------------------------------------------------------------------------|
| Research Agenda                                                                                                                                                                                                          | Outcome core sets                                                                                                                                                                                                                                                                 | Patient reported outcomes                                                                                                                                                                                                       | Culture of OMERACT                                                                                                                                                                                 | Consequences outside OMERACT                                                                                                                                               |
| Generating challenging ideas<br><br>Identification of patient-relevant research topics: <ul style="list-style-type: none"> <li>• Well being</li> <li>• Fatigue</li> <li>• Sleep disturbance</li> <li>• Flares</li> </ul> | Identification of patient relevant domains to include in core sets for clinical trials: <ul style="list-style-type: none"> <li>• Fibromyalgia</li> <li>• Psoriatic Arthritis</li> <li>• Vasculitis</li> <li>• Gout</li> <li>• MRI</li> <li>• MCID</li> <li>• Remission</li> </ul> | Acceptable, understandable and feasible outcome measures for <ul style="list-style-type: none"> <li>• Monitoring adverse events</li> <li>• Work productivity</li> <li>• Flares</li> <li>• Psychosocial interventions</li> </ul> | <ul style="list-style-type: none"> <li>• Attitudes</li> <li>• Communication</li> <li>• Perceptions</li> <li>• Motivation</li> <li>• Relational empowerment</li> <li>• Personal benefits</li> </ul> | <ul style="list-style-type: none"> <li>• Local initiatives</li> <li>• Local and national networks of partners</li> <li>• EULAR</li> <li>• COMET</li> <li>• ISDM</li> </ul> |
| Reality check                                                                                                                                                                                                            |                                                                                                                                                                                                                                                                                   |                                                                                                                                                                                                                                 |                                                                                                                                                                                                    |                                                                                                                                                                            |



## Abbreviations

|         |                                               |
|---------|-----------------------------------------------|
| COMET   | Core Outcome Measures in Effectiveness Trials |
| EULAR   | European League Against Rheumatism            |
| ISDM    | International Shared Decision Making          |
| MCID    | Minimal Clinically Important Difference       |
| MRI     | Magnetic Resonance Imaging                    |
| OMERACT | Outcome Measurement in Rheumatology           |
| PRO     | Patient Reported Outcome                      |
| RA      | Rheumatoid Arthritis                          |

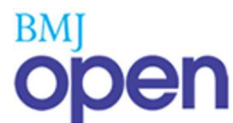

**Involving patient research partners has a significant impact on outcomes research: an example from the international OMERACT conferences.**

|                                 |                                                                                                                                                                                                                                                                                                      |
|---------------------------------|------------------------------------------------------------------------------------------------------------------------------------------------------------------------------------------------------------------------------------------------------------------------------------------------------|
| Journal:                        | <i>BMJ Open</i>                                                                                                                                                                                                                                                                                      |
| Manuscript ID:                  | bmjopen-2012-002241.R1                                                                                                                                                                                                                                                                               |
| Article Type:                   | Research                                                                                                                                                                                                                                                                                             |
| Date Submitted by the Author:   | 18-Feb-2013                                                                                                                                                                                                                                                                                          |
| Complete List of Authors:       | Wit, Maarten; VU Medical Centre , Metamedica<br>Abma, Tineke; VU Medical Centre, Metamedica<br>Koelewijn-van Loon, Marije; Maastricht University Medical Centre,<br>Department of General Practice<br>Collins, Sarah; Patient Research Partner,<br>Kirwan, John; University of Bristol, Rheumatology |
| <b>Primary Subject Heading</b>: | Rheumatology                                                                                                                                                                                                                                                                                         |
| Secondary Subject Heading:      | Qualitative research                                                                                                                                                                                                                                                                                 |
| Keywords:                       | HEALTH IMPACT ASSESSMENT, QUALITATIVE RESEARCH, RHEUMATOLOGY                                                                                                                                                                                                                                         |
|                                 |                                                                                                                                                                                                                                                                                                      |

SCHOLARONE™  
Manuscripts

## Article Summary

### Article focus

- Since 2002 patients have participated as collaborative partners in the biannual conference on Outcome Measures in Rheumatology (OMERACT).
- Although the contribution of patients has been praised and there is a wide-spread call for scientific publications on the impact of engaging with patients, no systematically obtained evidence has been published to support the idea that structural involvement of patients in research conferences is beneficial.
- Our qualitative study reports the combined results of a thematic document analysis and 32 semi structured interviews with all stakeholders including researchers, patient participants and representatives from pharmaceutical industry and international regulators.

### Key messages

- Long term engagement with arthritis patients in OMERACT conferences has significantly influenced outcome research in the field of rheumatology.
- Patients have successfully contributed to the research agenda of OMERACT by identifying new domains that are important for patients, and provided the patient perspective in the development of core outcome measurement sets and the development of patient reported outcome measures.

### Strengths and limitations of this study

- Triangulation of the combined review of the document analysis and interviews, together with the active involvement of all team members representing a variety of perspectives in the phase of data analysis and interpretation, have enhanced the validity of the study.

- The unique context of the OMERACT conferences may limit the generalizability of the results so comparable evaluation studies in other conference formats would be worthwhile.

For peer review only

1  
2  
3 Incorporating the patient perspective in health care research is strongly promoted by policy  
4 makers,<sup>1-4</sup> funding bodies and international regulators. Many theoretical benefits from patient  
5 involvement in research have been reported,<sup>5-8</sup> such as improving the relevance of research  
6 questions, improving recruitment of study participants, and increasing chances for funding  
7 and dissemination of results. In addition there is an increasing recognition of the essential role  
8 of patients in outcome research.<sup>9</sup> The USA Food and Drug Administration (FDA) has made  
9 patient involvement mandatory in the process of the development of patient reported outcome  
10 measures<sup>10 11</sup> and in the context of COMET (Core Outcome Measures in Effectiveness Trials)  
11 patient contributions are seen as crucial in defining domains that are relevant to include in  
12 core outcome measurement sets for clinical trials.<sup>12</sup> Development of core outcome sets might  
13 lead to less variety of incomparable and inappropriate outcome measures, more patient  
14 oriented endpoints and less bias by selective reporting of only positive or statistically relevant  
15 outcomes.<sup>13</sup> Core outcome measurement sets may ease the work of systematic reviewers in  
16 synthesizing the results of multiple studies.<sup>14 15</sup> The question is however whether these  
17 theoretical benefits of patient involvement in outcome research make any difference in  
18 practice.

19  
20  
21  
22  
23  
24  
25  
26  
27  
28  
29  
30  
31  
32  
33  
34  
35  
36  
37  
38  
39  
40  
41  
42  
43  
44  
45  
46  
47  
48  
49  
50  
51  
52  
53  
54  
55  
56  
57  
58  
59  
60

The international group Outcome Measures in Rheumatology (OMERACT), which defines core outcome measurement sets in rheumatic diseases, first included patient participants at its 6<sup>th</sup> bi-annual conference in 2002 and has continued to do so. This provides an opportunity to analyse the consequences and address the important question of whether patient participation has resulted in any demonstrable impact on the nature of its research activity.

Patient involvement in OMERACT has been presented as beneficial and the 2002 conference report concluded that “the preliminary success of this forum” was the basis for “continued and possibly expanded patient participation at the next OMERACT meeting”.<sup>16</sup>

1  
2  
3 Two conferences later others perceived the involvement of patients as “indicative of the  
4 beginning of a paradigm shift in thinking about RA outcomes over the last 5 years”.<sup>17</sup> Since  
5 then OMERACT has formulated three principles recognising the essential role of patients in  
6 outcome research.<sup>18</sup> First, patients’ input is indispensable when defining relevant outcome  
7 measures, identifying domains that are important from the perspective of patients, and  
8 assessing feasibility of measurement tools. Second, structural involvement of patients during  
9 the whole research process provides face validity. Third, OMERACT intends “to ground  
10 theoretical discussions in the lived experience of arthritis, and in concepts which can be  
11 readily communicated to patients to help with therapeutic decision making”.<sup>18</sup>  
12  
13  
14  
15  
16  
17  
18  
19  
20  
21  
22

23 However, the validity of these arguments has never been substantiated by robust evidence  
24 for the effectiveness of patient participation in OMERACT and it is not clear whether or how  
25 this involvement has influenced methodologies, procedures, attitudes, and research outcomes.  
26 Therefore, the objective of this study is to describe and evaluate the contributions made by  
27 patients since OMERACT started implementing structural patient participation in its  
28 conferences. We review the impact of patients on the research agenda and the development of  
29 patient reported outcomes (PRO’s) and explore how including patients has influenced the  
30 culture and structure of the OMERACT conference  
31  
32  
33  
34  
35  
36  
37  
38  
39  
40  
41  
42

### 43 **Method**

44 Patient participation in research is a new phenomenon and often not reported or reflected on  
45 in scientific publications. This lack of written sources in the scientific literature complicates  
46 the study of the process and impact of patient participation through a review of relevant  
47 literature. A provisory search using Pubmed (March 2010) for the terms “patient  
48 participation” OR “patient involvement” OR “user involvement” OR “consumer  
49 involvement” AND “OMERACT” did not generate any relevant reference. Therefore we  
50  
51  
52  
53  
54  
55  
56  
57  
58  
59  
60

1  
2  
3 conducted a content analysis of relevant documents (any written material on the topic of  
4  
5 patient participation).  
6

7 Documents are a stable, rich source of contextual information, providing well-grounded  
8  
9 data on events or situations at low costs. A sound document analysis is rule-bound,  
10  
11 systematic, following a coding process where raw data are aggregated into units describing  
12  
13 the content.<sup>19</sup> We included OMERACT conference proceedings as published by The Journal  
14  
15 of Rheumatology (1992-2010) and 'grey literature' such as correspondence, invitations,  
16  
17 session reports, e-mails and OMERACT policy documents. The review focused on the  
18  
19 arguments, reception and evolution of patient involvement in OMERACT conferences and the  
20  
21 contributions made by patients.  
22  
23

24  
25 Subsequently a responsive evaluation took place during OMERACT 10 (Malaysia, 2010)  
26  
27 using qualitative interviews with representatives of stakeholders. Responsive evaluation is  
28  
29 grounded in the hermeneutic research tradition and is used by social scientists to interpret  
30  
31 meanings that participants attribute to a phenomenon, here the history and impact of a decade  
32  
33 of patient participation from the perspective of the conference delegates. It samples all  
34  
35 stakeholders and does not seek consensus, but respects the plurality of opinions, values and  
36  
37 interests. This ensures that no perspective is omitted as the result of an imbalance of power.<sup>20</sup>  
38  
39

40  
41 The first author (MW) has been involved in OMERACT since 2002 as a patient  
42  
43 participant. He has a rheumatic condition and has been educated as a responsive researcher.  
44  
45 Characteristics for a responsive researcher are a multiple partiality and the intent to enhance  
46  
47 mutual understanding among all stakeholders. The last author (JK) has been involved in  
48  
49 OMERACT since the first conference (1992) and has been the leader of the patient  
50  
51 perspective workshop between 2002-2012. Having witnessed the involvement of patients  
52  
53 firsthand from the very beginning MW and JK provided useful information to start the  
54  
55 research, yet it also alerted them to critically reflect how this engagement influenced the  
56  
57  
58  
59  
60

1  
2  
3 research, and how to prevent bias. Therefore two independent experts (TA, MK) were added  
4  
5 to the team. They had no relations with the OMERACT conference and its participants, and  
6  
7 TA acted as peer-debriefer discussing dilemmas and challenging methodological decisions  
8  
9 with MW.<sup>21</sup>  
10

11 The first author held 32 semi-structured interviews before, during and after the 10<sup>th</sup>  
12  
13 conference (Table 1) and included senior (n=10) and junior researchers (n=2), representatives  
14  
15 of pharmacological industry and regulators (n=2), conference staff (n=2), new patient  
16  
17 participants (n=8) and experienced patient participants (n=8). The interviewees were invited  
18  
19 and informed by e-mail. The patient participants were aware of the purpose of the study  
20  
21 through a one page announcement in the pre-conference patient pack and were asked for  
22  
23 informed consent. In the Netherlands no ethical approval is required for non-intrusive  
24  
25 interviews only.  
26  
27

28  
29 Twenty-eight interviews were recorded, transcribed by an independent secretariat and  
30  
31 subjected to a responder check. Three interviews were summarized in a report, one interview  
32  
33 took place without protocol and, on request of the interviewee, without recording (PF). One  
34  
35 interview was done through Skype (PP). The average duration of the interviews was over 50  
36  
37 minutes, most of them taking place in the humid open lobby of the conference resort. Twenty-  
38  
39 four interviews were held in English of which six was not the native language. Eight  
40  
41 interviews were in Dutch.  
42  
43

44  
45 The interview protocols were slightly different for professionals, new patients and  
46  
47 experienced patients. The topics were not only derived from the document analysis but also  
48  
49 from four pilot interviews and the personal knowledge of MW and JK and the expertise of  
50  
51 TA. The topics dealt with: the expected role of patient participants, their selection, preparation  
52  
53 and support, and the expected or provided contribution to the OMERACT conference.  
54  
55 'Fatigue' was added as a potential probe because publications had already shown that this  
56  
57  
58  
59  
60



1  
2  
3 topic deserved special attention with regard to our research questions.<sup>22-24</sup> Participants with  
4  
5 long term experience in OMERACT were asked retrospectively to describe their memories of  
6  
7 the discussions and decisions taken about patient participation before and after 2002. Their  
8  
9 recollections might be characterized as ‘oral history’.  
10

11  
12  
13  
14 *Selection of interviewees* - At OMERACT 10 a total of 172 delegates participated, 152  
15  
16 professionals and 20 patients. Nine patients attended the conference for the first time. All  
17  
18 interviewees, except for one patient participant from the hosting country, were selected by  
19  
20 MW and JK following an emergent purposive sampling approach.<sup>21</sup> They used a list of  
21  
22 attendees provided by the congress agency, covering four out of five criteria found to be  
23  
24 important (stakeholder background, gender, geographical spread and number of OMERACT  
25  
26 conferences attended). The criterion ‘opinion about patient involvement’ was assessed on the  
27  
28 basis of authors’ insight of the participant as being ‘positive’ (e.g. contributing to the patient  
29  
30 perspective workshop or involving partners in own activities), ‘indifferent’ or ‘skeptical’ (e.g.  
31  
32 resistant, not collaborating with partners). When it became clear during the process of data  
33  
34 collection that certain criteria were not well covered new participants were approached till  
35  
36 maximum variation was realized. For example, two interviewees who were chosen because  
37  
38 of their previously reported criticism of involving patients, showed a considerable change in  
39  
40 perception of patient involvement in a positive way. For this reason two more interviews with  
41  
42 professionals who had expressed critical comments during the last conference were arranged.  
43  
44 Finally, to ensure the opinions of young investigators, two OMERACT Fellows were  
45  
46 approached, one undertaking a PhD in translational research and one post doctoral researcher  
47  
48 active in clinical research.  
49  
50  
51  
52

53  
54 Saturation was defined as a repetition of data; theoretical saturation as achieving  
55  
56 sufficiently robust empirical data to support and describe the identified themes and main  
57  
58  
59  
60

1  
2  
3 categories. Saturation was discussed and agreed within the research team. In total the  
4  
5 perceptions and experiences of 16 patient participants and 16 professionals were collected  
6  
7 (Table 1).  
8  
9

10  
11 [insert Table 1]  
12  
13

14  
15  
16 *Data-analysis* - A thematic content analysis focused in particular on the reported  
17  
18 contributions attributed to patient participants. Coding of the interviews was done separately  
19  
20 by MW and an independent second coder (MK) who had never worked with active patient  
21  
22 involvement before. This resulted in 211 detailed codes that were then combined into 27 sub-  
23  
24 categories. During several meetings, the project team, representing various backgrounds,  
25  
26 discussed the codes and subcategories from a variety of perspectives, and sought natural  
27  
28 groupings or categories within the data. Triangulation was used in two different meanings:  
29  
30 First, as a means of verifying findings against another source (interview) or another method  
31  
32 (document analysis) and to enhance the validity of the data. Second, as a means to enrich the  
33  
34 data collection and improve the face-validity by synthesizing findings from the document  
35  
36 analysis with the personal memories and experiences of respondents who looked back in time.  
37  
38 By doing so, gaps in the document analysis could be filled in.  
39  
40  
41

42  
43 The relevance and validity of the analysis and interpretation of the data was increased by the  
44  
45 involvement of an external expert in qualitative health research (TA) as well as by inviting  
46  
47 one of the patients (SC) who attended OMERACT 10 for the first time to join the research  
48  
49 team. As a patient research partner<sup>25</sup> she was involved in the coding, data analysis and data  
50  
51 interpretation to guarantee the patient perspective. To protect the anonymity of the  
52  
53 participants all quotes are presented in the “she”-form. Quotes of professional researchers are  
54  
55 indicated by ‘R’ and those of patient research partners (in short: ‘partners’) by ‘P’.  
56  
57  
58  
59  
60

## Results

### History of patient involvement at OMERACT

OMERACT started in 1992 as an initiative to overcome the problem of widespread and inconsistent use of many different outcome measures in rheumatoid arthritis (RA) clinical trials. The objective was to improve “the accuracy and responsiveness to change of clinically relevant (to patient and clinician) endpoints”.<sup>26</sup> Rheumatologist from many countries met in Maastricht and achieved consensus on a core set of outcomes for RA. The RA core set was endorsed by the WHO.<sup>27</sup> The initial stand alone conference was sufficiently successful that it was followed by conferences in alternate years continuing the discussion and consensus building about new core sets for other rheumatic diseases and new measurement instruments.

During the fifth OMERACT conference (2000) participants discussed the concept of a minimum clinically important difference (MCID). Based on methodological arguments a growing interest in patient reported outcomes emerged, culminating in a spontaneous proposal at the final session to invite patients to the next conference. All participants voted in favour of this proposal.<sup>28</sup> The chair of the conference felt confident about the proposal because it had been discussed in the organising committee before, although no decisions had been taken. Participants of the MCID module argued that patient perspectives should be explored further<sup>29</sup> and took responsibility for identifying 11 patients to join OMERACT 6 and to review the RA core set.

Our document analysis revealed the unconditional positive reception of patient delegates at OMERACT conferences, and partners confirmed that concerns regarding their involvement were misplaced. They felt their reception was extremely welcoming. “There was a tangible

1  
2  
3 feeling of relief and a belief that patients' views and opinions would be listened to and  
4 incorporated into the deliberations".<sup>30</sup> Also the organizers were excited and called the patient  
5 involvement "a tremendous success".<sup>31</sup>  
6  
7  
8

9  
10 Between 2002 and 2012 a total of 57 partners with different rheumatic diseases have  
11 participated as full delegates with equal voting rights.<sup>32</sup> Their role and contributions have  
12 developed over time. At the first conference (2002) they formed an homogeneous group of  
13 people with RA with little or no experience in scientific research. The level of involvement in  
14 the conference in general was relatively low, support was not organized and the number of  
15 sessions patients attended was limited. Contributions centred on participation in the workshop  
16 discussions about the severity of fatigue and the definition of low disease activity, although  
17 there was a keynote speech at the opening ceremony.<sup>30</sup> In contrast, by OMERACT 11 (2012)  
18 the partners were a heterogeneous group with different rheumatic conditions and different  
19 levels of experience, competences and cultural background. They received a pre-conference  
20 information pack and were actively supported by a pre-conference dinner, a glossary, training  
21 sessions and a buddy system. They carried out a variety of tasks similar to professionals such  
22 as giving plenary presentations, co-chairing breakout sessions, reporting back from breakout  
23 sessions and preparing consensus statements. Several partners became co-authors of peer-  
24 reviewed publications.  
25  
26  
27  
28  
29  
30  
31  
32  
33  
34  
35  
36  
37  
38  
39  
40  
41  
42  
43  
44

#### 45 **Patient contributions to OMERACT meetings and outcome research**

46 Interviewees reported a variety of contributions made by partners during the conference  
47 where they are an integral part of the deliberative and consensus-building process.<sup>18</sup> These  
48 examples are presented below and compared with the document analyses when appropriate.  
49  
50 Because research in the domain of fatigue has been reported as the most illustrative example,  
51 the contributions in this area will be described in more detail. Using the methodology  
52  
53  
54  
55  
56  
57  
58  
59  
60

1  
2  
3 described above we identified 5 main categories from the comments made during the  
4  
5 interviews with OMERACT participants (Table 2): Contributions to the research agenda; The  
6  
7 development of core sets; The development of patient reported outcomes (PRO's); The  
8  
9 culture of OMERACT; Consequences outside OMERACT. Finally we will highlight some of  
10  
11 the challenges that emerged from the interviews.  
12

13  
14  
15  
16 ***Contributions to the research agenda*** - From the very beginning partners had a significant  
17  
18 influence on the research agenda in the field of rheumatology by participating in OMERACT  
19  
20 workshops and small group discussions. They identified new outcome domains that are  
21  
22 relevant from their perspective.<sup>33</sup> The first Patient Perspective Workshop, attended by 11  
23  
24 patient participants and 41 professionals, focused on the development of “valid outcome  
25  
26 instruments that incorporate the perspective of the patient and to prepare the evidence and  
27  
28 arguments for their inclusion in the (RA) core set”<sup>24</sup>. The preconference paper pointed out the  
29  
30 methodological and political challenges: How to elicit and incorporate preferences of patients  
31  
32 in RCT's? <sup>32</sup> The workshop had been specifically arranged to support the partner  
33  
34 contributions including a pre- and post-workshop meeting. The workshop identified  
35  
36 subjective experiences of RA, not encompassed in the RA core set but important  
37  
38 consequences of the disease: a sense of well being, fatigue, and disturbed sleep.<sup>24</sup>  
39  
40  
41  
42

43 After the first conference attended by partners, it became apparent that perspectives of  
44  
45 professionals and patients differ and more research was needed to articulate patients  
46  
47 priorities.<sup>34-37</sup> Partners emphasized the need for an holistic approach to people with arthritis.<sup>30</sup>  
48  
49 The acknowledgement of the discordance of perspectives initiated new studies looking into  
50  
51 the preferences, opinions and experiences of people with rheumatic diseases <sup>22 38 39</sup> and  
52  
53 developing patient-derived core sets.<sup>40</sup> This made participants more aware of the emerging  
54  
55 patient perspective: “the whole realm of things we haven't looked at” [RA]. New topics  
56  
57  
58  
59  
60

1  
2  
3 emerged: remission, pain, flares and foot problems. One interviewee clearly stated that  
4  
5 partners “inspired me for new projects to study the variety in new productivity outcome  
6  
7 measures” [RK].  
8  
9

10  
11 ***Case-study of fatigue*** - Since 2002 when partners identified new topics for research, studies  
12  
13 have been initiated with firm involvement of partners in the field of sleep disturbances, flares  
14  
15 and well being. The most progress has been made in fatigue, and the emergence of fatigue as  
16  
17 a relevant outcome measure in RA provides an illustrative case history. When asked for the  
18  
19 greatest benefit of including partners in OMERACT conferences interviewees unanimously  
20  
21 confirmed that the topic of fatigue would not have been on the research agenda without  
22  
23 partners expressing their concerns about fatigue as an often neglected symptom of their  
24  
25 disease and without the listening of receptive professionals. One of the partners attending  
26  
27 OMERACT 6 recalled:  
28  
29  
30

31  
32  
33  
34 “I can’t remember who brought up the subject, but someone mentioned fatigue. And that  
35  
36 was the occasion when one of the other delegates said ‘well, everybody gets tired’. One  
37  
38 patient shot to her feet and said ‘no, it’s not, it’s not like anything you’ve ever  
39  
40 experienced; it’s not tiredness; it’s a complete wipe-out’.” [PM]  
41  
42  
43  
44

45 Early descriptions of fatigue at OMERACT 6 and 7 led to substantial qualitative and  
46  
47 quantitative research. The first studies investigated the prevalence and severity of fatigue in  
48  
49 RA and how patients describe their fatigue.<sup>41-44</sup> The next step comprised a systematic review  
50  
51 of measurement instruments for fatigue<sup>45</sup> that explored the rigor of existing measurement  
52  
53 tools and the need to develop patient-derived instruments that are trustworthy, capturing  
54  
55 concepts and language of patients. Furthermore a standardized visual analogue scale,  
56  
57  
58  
59  
60

1  
2  
3 opportunities for electronic gathering of data and exploring mechanisms of fatigue that could  
4  
5 guide researchers in the development of effective interventions, were added to the research  
6  
7 agenda. New data, presented at OMERACT 8 (2006) showed that fatigue is not a  
8  
9 consequence of RA, but an independent variable that adds new information to the existing RA  
10  
11 core set.<sup>46 47</sup> This new perception resulted in the acceptance of fatigue as an important  
12  
13 outcome for clinical trials.<sup>48 49</sup> Fatigue was subsequently added to the RA core set as a  
14  
15 recommended outcome.<sup>50</sup>

16  
17  
18 More powerful instruments for measuring fatigue in RA have since been devised and  
19  
20 validated, starting from the perspective of the patients.<sup>51 52</sup> Outside OMERACT researchers  
21  
22 initiated similar studies, focusing on the communication between patients and health  
23  
24 professionals in the consultation room.<sup>53</sup>

25  
26  
27  
28  
29 The thematic document analysis provided additional evidence for the statement that without  
30  
31 patients raising their voice at OMERACT 6 fatigue would not have been high on the research  
32  
33 agenda. The issue of fatigue was not new for rheumatologists.<sup>54-56</sup> Fatigue was a symptom  
34  
35 regularly reported during clinical consultations, but not incorporated in guidelines for  
36  
37 monitoring and managing. Fatigue in ankylosing spondylitis was identified by physicians and  
38  
39 incorporated in a disease status questionnaire.<sup>57</sup> And during OMERACT 3 (1996) delegates  
40  
41 carried out a ranking exercise trying to prioritize psychosocial measures in musculoskeletal  
42  
43 diseases. The discussion groups identified outcomes such as pain, depression, anxiety and  
44  
45 fatigue as major concerns.<sup>58</sup> For fatigue eight examples of measurement instruments were  
46  
47 given.<sup>59</sup> However, after this workshop, nothing happened for six years, until patients raised  
48  
49 the urgency of fatigue as a serious symptom.  
50  
51  
52  
53  
54  
55  
56  
57  
58  
59  
60

1  
2  
3 Retrospectively, professionals admitted they had a blind spot for fatigue in RA and only  
4  
5 hearing from partners at OMERACT made them change their perception of fatigue as an  
6  
7 important outcome:  
8  
9

10  
11 “Because when I was working in oncology before, during university training, of course  
12  
13 we saw that the patients were lying in bed all day and we knew they were exhausted, call  
14  
15 that fatigue. But patients with RA, we were ignorant.” [RC]  
16  
17  
18  
19

20  
21 Another physician, involved in OMERACT from the start:  
22  
23  
24

25 “We were first discussing on fatigue and to be honest: I never ever had before heard of  
26  
27 fatigue being a problem in rheumatology. So it got into my mind and then I got thinking  
28  
29 about it and then, when I was back, I asked patients if they felt fatigue and I got nearly a  
30  
31 100% positive response. So it was like a coming out, you know. I listened to the patients  
32  
33 before but bringing it to a specific topic, that was really what I learned at OMERACT.”  
34  
35  
36 [RA]  
37  
38  
39  
40

41 [Insert Table 2]  
42  
43  
44

#### 45 ***The development of core outcome measurement sets and patient reported outcomes –***

46  
47 During the first two conferences including patients the focus of partners’ contributions was on  
48  
49 agenda-setting and identifying relevant outcomes for clinical trials. Then, partners became  
50  
51 gradually involved on different levels in other OMERACT activities, varying from being  
52  
53 consulted (e.g. in a Delphi process) to full collaboration (as partner and as co-author). They  
54  
55 contributed by identifying domains that are relevant for disease-specific core sets for psoriatic  
56  
57  
58  
59  
60



1  
2  
3 arthritis,<sup>60</sup> fibromyalgia,<sup>61 62</sup> gout<sup>63</sup> and vasculitis.<sup>64</sup> Furthermore they contributed to the  
4  
5 development of core outcome measurement sets for methodological or clinical concepts such  
6  
7 as MCID and remission.<sup>65</sup> Partners have also played a role in the assessment of the feasibility  
8  
9 of instruments and core sets, one of the three key components of the OMERACT Filter.<sup>66</sup>  
10

11  
12 Partners have been helpful in the development of PRO measurement instruments in the  
13  
14 field of work productivity, monitoring adverse events,<sup>67</sup> flares<sup>68</sup> and psychosocial  
15  
16 interventions such as self-management programs<sup>69</sup>. At the 2010 conference, during the  
17  
18 plenary session on flares in RA, one of the partners gave a personal testimony about the  
19  
20 devastating impact of the unpredictable nature of RA. A professional in the audience was  
21  
22 surprised and reported: “It demonstrates that the disease activity fluctuates more than we can  
23  
24 see in our data: Our instruments are more flat, and by the limited frequency of measuring we  
25  
26 filter fluctuations out”. [RI]  
27  
28  
29  
30

31  
32 Regulators require strong evidence for the effectiveness of new medicines by demonstrating  
33  
34 accurately that they reduce structural progression as well as patient important outcomes. By  
35  
36 doing both of these, developing standards for high quality imaging techniques and exploring  
37  
38 new PRO’s and translating them into valid and feasible measures, OMERACT has been  
39  
40 extremely advantageous for the negotiations with regulators about the registration and  
41  
42 relatively generous reimbursement of new biologic agents:  
43  
44  
45  
46

47  
48 “I think, to be really honest, the patient involvement process in OMERACT and the  
49  
50 changes in outcome measurements and the use of them in the drug tests has made a  
51  
52 real difference for so many patients.” [RB]  
53  
54  
55  
56  
57  
58  
59  
60

1  
2  
3 *The culture of OMERACT*– In spite of the initial unanimous vote to invite patients, some  
4  
5 researchers were concerned about changing the layout of the conference:  
6  
7

8  
9  
10 “My original expectation of a limited contribution was based on fear that patients were  
11  
12 not able to transcend their personal experience and to generalize ... new stakeholders  
13  
14 often don’t have knowledge about clinometric.” [RE]  
15  
16

17  
18 In retrospect researchers explained that they deferred to the proposal in order to reflect a core  
19  
20 principle of OMERACT of not immediately rejecting new ideas: “To respect and listen rather  
21  
22 than just react”. [RA]  
23  
24

25 Looking back, the number of professional participants who were in favour of partners  
26  
27 at the conference slowly increased: “I was impressed by the very good working flow”. [RC]  
28  
29 Participants confirmed that the presence of partners has changed their way of thinking and  
30  
31 talking. “They made my blind spot visible” [RK] and another professional reported:  
32  
33  
34  
35

36 “Now what we have found is, and I changed my view, [be]cause it wasn’t only from  
37  
38 OMERACT. As I got to know more and more patients, I realized, this sounds stupid  
39  
40 because it’s so obvious but it wasn’t obvious to me, that a patient isn’t their disease. A  
41  
42 patient is a person who happens to have a disease. What a big difference. Because if  
43  
44 you’re a person that happens to have a disease, then for example you might have  
45  
46 incredible skills in an area that might be very useful to move a clinical trial forward.  
47  
48 So once I came to that realization then patient involvement becomes an absolutely  
49  
50 obvious and integral part of moving forward.” [RA]  
51  
52  
53  
54  
55  
56  
57  
58  
59  
60

1  
2  
3 Partners improved communication and brought dynamics to the dialogue because they are  
4 motivated and constructive, without a personal agenda. At a conference such as OMERACT,  
5 where the discussion about methodology may become extremely technical, partners reminded  
6 participants of the common goal of the conference by providing a human face of a person  
7 living with the condition day by day. Their presence made participants more explicit about the  
8 objectives of sessions and more explanatory about terms and concepts under discussion.  
9  
10 Together with a reduced use of jargon this 'forced' simplification resulted in fewer  
11 misunderstandings for everyone.  
12  
13  
14  
15  
16  
17  
18  
19

20 For some professionals the presence of partners complicated the communication.  
21 Some believed that partners slow down the process because they are not familiar with  
22 technical issues. Others felt disinclined to say what they wanted to out of respect to partners  
23 or hesitated to criticize them. One researcher felt embarrassed in the presence of partners and  
24 put her own expertise aside to keep things simple: "Patients didn't sometimes understand the  
25 objective of the research, which hindered us". [RK] One of the partners admitted that "it is a  
26 thin line between providing input and causing irritation". [PN]  
27  
28  
29  
30  
31  
32  
33  
34  
35  
36  
37

38 An analysis of the responses of patients attending OMERACT for the first time showed that  
39 new partners experienced a significant learning curve and a variety of personal benefits.<sup>70</sup>  
40 Results from this study suggest that in fact all participants learned from the contact with other  
41 stakeholders. During this process participants gained trust, respect and understanding,  
42 reflecting the emergence of relational empowerment:  
43  
44  
45  
46  
47  
48  
49  
50

51 "Patients were a kind of sparring partner when I entered a relatively new area. That  
52 was fun and did clarify a lot". [RK]  
53  
54  
55  
56  
57  
58  
59  
60

1  
2  
3 Relational empowerment in the context of health research can be understood as a process in  
4  
5 which traditional doctor-patient relationships transform into equal partnerships enabling  
6  
7 mutual learning processes.<sup>71</sup> All participants become stronger by sharing knowledge and  
8  
9 responsibilities, and educating and helping each other.  
10

11  
12 The reported benefits were easiest to identify at the beginning when the level of  
13  
14 involvement was still low. They became more diffuse when partners were structurally  
15  
16 involved as full and equal collaborators. One interviewee mentioned “a reality check” as an  
17  
18 important benefit of partners attending the conference. For professionals it offered the  
19  
20 opportunity to check the relevance of the scope of their research: Are we doing the right  
21  
22 things according to patients and are we using the right tools and methods? It is a belief of  
23  
24 professionals that this kind of feedback is important to legitimize their research and, together  
25  
26 with the belief of partners that without this research no innovations will take place, it  
27  
28 strengthened the mutual empowerment of both.  
29  
30  
31  
32  
33

34 ***Consequences outside OMERACT*** – The lessons learnt at OMERACT were noticed by the  
35  
36 outside world. Partners returning home after the conference have continued introducing  
37  
38 patient participation in local and national research projects or established networks of patient  
39  
40 research partners.<sup>72-75</sup> Some delegates published a working framework for incorporating the  
41  
42 patient perspective in outcome research.<sup>76</sup> With the input from several OMERACT  
43  
44 participants the European League Against Rheumatism (EULAR) developed  
45  
46 recommendations for the inclusion of patient representatives in scientific projects.<sup>25</sup>  
47  
48 Following these recommendations a new patient reported quality of life instrument for RA  
49  
50 was developed and validated.<sup>40 77</sup> Based on the experiences of OMERACT the organizing  
51  
52 committee of the 6<sup>th</sup> International Shared Decision Making conference decided in 2011 to  
53  
54 invite patient participants.<sup>78</sup> In the same year OMERACT delegates, partners as well as  
55  
56  
57  
58  
59  
60

1  
2  
3 professionals, participated in the 2<sup>nd</sup> Core Outcome Measures in Effectiveness Trials  
4 (COMET) conference, demonstrating how the OMERACT methodology can be utilized in  
5 other disease areas.<sup>12</sup>  
6  
7  
8  
9

10  
11 ***Remaining challenges emerging from the interviews*** – The role and contribution of patient  
12 participants have changed over time and procedures for patient selection and support have  
13 been developed in order to identify patient participants who are able to make a difference.  
14 There is still a debate going on whether patients should be selected through strict criteria such  
15 as education, communication skills, attitude and familiarity with scientific research. Some  
16 argue that an expert meeting like OMERACT needs expert patients who have extended  
17 knowledge about methodologies of outcome research, and are able to provide a kind of  
18 aggregated patient input. At OMERACT this group represents a minority of delegates, who  
19 are reluctant to allocate the same rights and power to partners as to the professionals. The vast  
20 majority believes that many patients are able to contribute to an OMERACT conference and  
21 emphasizes that a heterogeneous group of partners in age, gender, condition, experience and  
22 cultural background are advantageous for the conference. They intend to develop full  
23 representative participation in all phases of research by including partners in working group  
24 activities between conferences. Finally, some participants point out the potential risks of  
25 partners who become too experienced. They appreciate the naive input as a patient, with a  
26 minimum of preparation and reflection. They assume that as soon as you start thinking about  
27 your contribution, you lose the unique, individual perspective and become a patient-expert  
28 who aligns too easily with professionals.  
29  
30  
31  
32  
33  
34  
35  
36  
37  
38  
39  
40  
41  
42  
43  
44  
45  
46  
47  
48  
49  
50

51  
52 Professionals shared the opinion that partners need training, although they reported  
53 different ideas about the content and aims of such training. Experienced partners as well as  
54 novice researchers felt that any new participant has to learn the OMERACT objectives,  
55  
56  
57  
58  
59  
60

1  
2  
3 culture and procedures first, before they can become fully productive, mostly at the second or  
4  
5 third conference. This accords with the expectations of partners who attended OMERACT for  
6  
7 the first time.  
8  
9

### 10 11 **Overview of findings**

12  
13  
14 These results show that a decade of patient involvement has been successful and had a  
15  
16 significant impact on various aspects of outcome research. Perspectives of patients are  
17  
18 different from those of health professionals. Broad consensus exists that partners at  
19  
20 OMERACT have played a vital role in identifying domains relevant from the perspective of  
21  
22 patients and in developing new PROs such as fatigue, sleep quality, flares and work  
23  
24 productivity. Especially in the area of fatigue we have shown that patient involvement on  
25  
26 different levels and in different phases improves the quality of outcome research. By  
27  
28 combining evidence-based knowledge of researchers and the experiential knowledge of  
29  
30 patients, a synthesis of both kinds of knowledge has been achieved and documented. The  
31  
32 benefits are assessment tools that accurately measure what really matters to patients, are  
33  
34 formulated in understandable language and are user-friendly. Other benefits go beyond  
35  
36 improving clinical outcome research and include improved communication, mutual  
37  
38 empowerment, changed attitudes and substantial consequences outside OMERACT.  
39  
40  
41  
42  
43  
44

### 45 **Discussion**

46  
47 We set out to describe and evaluate the contribution of patients as partners in rheumatology  
48  
49 outcome research, reviewing their impact on the research agenda and the culture and process  
50  
51 of the OMERACT conference. The document analysis provided the recorded facts while the  
52  
53 interviews allowed an exploration of intentions, attitudes and perceived benefits or harms of  
54  
55 patient participation that complements the document analysis. Since validated methodologies  
56  
57  
58  
59  
60

1  
2  
3 for demonstrating impact of collaboration with patients in the context of research are lacking,  
4  
5 a responsive interview methodology seemed to be a good approach.  
6

7 Both strengths and limitations of this study relate to the personal experience of the first  
8 and last authors as participants in the developing process of patient partner participation.  
9  
10 Having witnessed the OMERACT process, actors and concerns of both the patient community  
11 and the research community was advantageous during the development of interview  
12 protocols, recruitment and selection of respondents and data analysis. For instance, the  
13 knowledge of the opinions of other participants made it possible to achieve maximum  
14 variation. Also, the active involvement in the support and training of partners created an  
15 adequate awareness of the relevant items to include in the study. The drawbacks of this  
16 engagement are the risks of subjectivity, blind spots and over- or under-identification with  
17 particular stakeholders. These risks have been addressed by applying strict quality measures  
18 for scientific rigor in qualitative, evaluation research.  
19  
20  
21  
22  
23  
24  
25  
26  
27  
28  
29  
30

31 The composition of the research team purposely included two external experts in  
32 qualitative research and a patient research partner, who were actively involved in the coding  
33 of interview transcripts and distilling relevant categories for impact, reduced the risk of  
34 subjectivity. Bias was avoided by the check-coding procedure in the analysis of the transcripts  
35 as at least two researchers independently coded each transcript, after which the whole team  
36 discussed the codes until consensus was reached. Saturation was also part of the discussion in  
37 the whole team. The inclusion of various stakeholder perspectives prevented one-sidedness.  
38  
39 No signals were identified to suggest that interviewees have simply given desirable answers,  
40 or just been friendly to the interviewer. Some interviewees have been rather critical, reporting  
41 several barriers for structural involvement of patients in research, but have always added  
42 constructive suggestions for improvement. Peer debriefing by an independent colleague (TA)  
43 further helped to prevent bias.  
44  
45  
46  
47  
48  
49  
50  
51  
52  
53  
54  
55  
56  
57  
58  
59  
60

1  
2  
3 Other limitations relate to the difficulties of demonstrating the ‘impact’ of patient  
4 involvement.<sup>9</sup> In OMERACT there is a strong belief that patient participation works, a belief  
5 that is nourished by the world-wide transition towards more patient-oriented health care and  
6 health research.<sup>79-82</sup> The assumption however that long term involvement of patients as equal  
7 partners guarantees sustainable inclusion of the patient perspective in outcome research  
8 complicates a thorough evaluation and makes it difficult to distinguish between expected,  
9 perceived and actual contributions. Many participants, not only partners, but also young  
10 researchers and other new-comers, are able to identify their own contribution and may not see  
11 how their input is reflected in the final outcomes. Partners reported almost unanimously not  
12 being able to confirm substantial contributions during their participation but they believed  
13 they did. More experienced participants, mostly professionals, were less reluctant in reporting  
14 illustrative examples of patient contributions.

15  
16  
17  
18  
19  
20  
21  
22  
23  
24  
25  
26  
27  
28  
29  
30 In a dialogue and consensus-based conference such as OMERACT many (f)actors  
31 contribute to the final outcomes. A linear causal relation between patient involvement and  
32 impact is therefore hard to establish; the processes of involvement are rather influenced by  
33 and influencing many (f)actors in a mutually interactive way. We found that when the level of  
34 involvement of partners increased from consultation to collaboration, it became harder to  
35 solely attribute individual or group contributions to the final outcomes. Because neither  
36 partners nor professionals act as a representative of any group or constituency it remains  
37 difficult to determine the influence of particular groups or individuals. Participation proved to  
38 be a dynamic process, especially when tasks were equally performed by patients and  
39 researchers, and when the dialogue between both took not only place during the official  
40 sessions, but also in the corridors of the conference.

41  
42  
43  
44  
45  
46  
47  
48  
49  
50  
51  
52  
53  
54 A last obstacle for demonstrating the influence of patient participation is the invisibility  
55 of experiential knowledge, often hidden in anecdotal stories. It has an impact that is rarely  
56  
57  
58  
59  
60



1  
2  
3 claimed by patients nor perceived by professionals. Personal comments are normally not  
4  
5 reported because they are not seen as a valuable and valid source of knowledge<sup>83</sup> and yet  
6  
7 clear documentation of meetings is required to ensure that patients' contributions become  
8  
9 visible.<sup>84</sup> Professionals focus on synthesizing data and may not notice that the dialogue with  
10  
11 patients works like a reality check, generates new ideas or changes their beliefs, behaviour or  
12  
13 perception. When partners appear to simply agree with the results presented at OMERACT it  
14  
15 might look as if they do not have any contribution to make, but in fact they confirm the value  
16  
17 of the work under discussion and provide face validity to the process. It is for this reason that  
18  
19 most professionals appreciate the feedback and input from partners, although not all are aware  
20  
21 of this reason. Realizing the importance of such a reality check is beneficial for the  
22  
23 management of realistic expectations: do not expect innovative ideas, brilliant suggestions  
24  
25 and new concepts when inviting partners to join research. Their contributions are often more  
26  
27 subtle and need the attention of a modest and committed researcher to be noticed.  
28  
29  
30

31  
32 Despite these limitations, we believe that the results presented in this study are relevant  
33  
34 and valid. It is undeniable that there is a growing belief that patient involvement has been  
35  
36 successful and brought a unique added value to the conference. Even those who were  
37  
38 originally among the most skeptical participants now report that they have changed their  
39  
40 perception about the expected contribution of patient research partners. This study is  
41  
42 conducted within the context of a scientific research conference in the field of rheumatology,  
43  
44 a long term somatic condition. Our ability to generalize the findings is therefore limited and  
45  
46 extrapolation to other research contexts or to other conditions should be done with care.  
47  
48  
49  
50  
51  
52  
53  
54  
55  
56  
57  
58  
59  
60

## References

1. Keizer B, Bless R. Pilot study on the position of health consumer and patients' organisations in seven EU countries. Den Haag: ZonMW, 2010:54.
2. Involve. People & participation; How to put citizens at the heart of decision-making. London: Beacon Press, 2005.
3. Staley K. Summary Exploring Impact: Public involvement in NHS, public health and social care research. Eastleigh.: INVOLVE, 2009.
4. Wright MT, Roche B, von Unger H, Block M, Gardner B. A call for an international collaboration on participatory research for health. *Health Promot Int* 2010;25(1):115-22.
5. Abma TA. Patients as partners in a health research agenda setting: the feasibility of a participatory methodology. *Eval Health Prof* 2006;29(4):424-39.
6. Abma TA, Nierse C, Widdershoven G. Patients as partners in responsive research: methodological notions for collaborations in mixed research teams. *Qualitative Health Research* 2009;19(3):401-15.
7. Abma TA, Broerse JE. Patient participation as dialogue: setting research agendas. *Health Expect* 2010;13(2):160-73.
8. Caron-Flinterman JF, Broerse JE, Bunders JF. The experiential knowledge of patients: a new resource for biomedical research? *Soc Sci Med* 2005;60(11):2575-84.
9. Staniszewska S, Haywood KL, Brett J, Tutton L. Patient and public involvement in patient-reported outcome measures: evolution not revolution. *Patient* 2012;5(2):79-87.
10. Speight J, Barendse SM. FDA guidance on patient reported outcomes. *BMJ* 2010;340:c2921.
11. Rowen D, Carlton J, Brazier JE, Mulhern B, Palfreyman S, Stevens K, et al. FDA on PROMs. Two important points. *BMJ* 2010;341:c5454.

- 1  
2  
3 12. Williamson PR, Altman DG, Blazeby JM, Clarke M, Gargon E. The COMET (Core  
4 Outcome Measures in Effectiveness Trials) Initiative. *Trials* 2011;12 (Suppl 1)(A70).  
5  
6  
7 13. Clarke M. Standardising outcomes for clinical trials and systematic reviews. *Trials*  
8 2007;8:39.  
9  
10  
11 14. Sinha IP, Smyth RL, Williamson PR. Using the Delphi technique to determine which  
12 outcomes to measure in clinical trials: Recommendations for the future based on a  
13 systematic review of existing studies. *PLoS Med* 2011;8(1).  
14  
15  
16 15. Williamson P, Clarke M. The COMET (Core Outcome Measures in Effectiveness Trials)  
17 Initiative: Its Role in Improving Cochrane Reviews. *Cochrane Database Syst Rev*  
18 2012;5:ED000041.  
19  
20  
21 16. Saag KG. OMERACT 6 brings new perspectives to rheumatology measurement research.  
22  
23  
24  
25  
26  
27  
28  
29 17. Heller JE, Shadick NA. Outcomes in rheumatoid arthritis: incorporating the patient  
30 perspective. *Current Opinion in Rheumatology* 2007;19(2):101-05.  
31  
32  
33 18. OMERACT. Guiding principles for patient research partner participation in OMERACT.  
34 Accessed: October 18; 2012: Available from: [http://www.omeract.org/pdf/2011-03-  
35 27%20Agreed%20Patient%20Participation%20Policy.pdf](http://www.omeract.org/pdf/2011-03-27%20Agreed%20Patient%20Participation%20Policy.pdf).  
36  
37  
38  
39 19. Guba EG, Lincoln YS. *Effective evaluation. Improving the usefulness of evaluation results  
40 through responsive and naturalistic approaches*. San Francisco: Jossey-Bass  
41 Publishers, 1988.  
42  
43  
44  
45  
46 20. Abma TA, Widdershoven GAM. Evaluation as a relationally responsible practice. In:  
47 Denzin N, Lincoln Y, editors. *Handbook for Qualitative Inquiry*. Los Angeles: SAGE  
48 Publications Ltd., 2011:669-80.  
49  
50  
51  
52 21. Lincoln Y, Guba EG. *Naturalistic inquiry*. Newbury Park: SAGE, 1985.  
53  
54  
55  
56  
57  
58  
59  
60

- 1  
2  
3 22. Hewlett S, Carr M, Ryan S, Kirwan J, Richards P, Carr A, et al. Outcomes generated by  
4 patients with rheumatoid arthritis: how important are they? *Musculoskeletal Care*  
5 2005;3(3):131-42.  
6  
7  
8  
9  
10 23. Hewlett S, Cockshott Z, Byron M, Kitchen K, Tipler S, Pope D, et al. Patients' perceptions  
11 of fatigue in rheumatoid arthritis: overwhelming, uncontrollable, ignored. *Arthritis*  
12 *and rheumatism* 2005;53(5):697-702.  
13  
14  
15  
16 24. Kirwan J, Heiberg T, Hewlett S, Hughes R, Kvien T, Ahlmen M, et al. Outcomes from the  
17 Patient Perspective Workshop at OMERACT 6. *Journal of Rheumatology*  
18 2003;30(4):868-72.  
19  
20  
21  
22  
23 25. de Wit MPT, Berlo SE, Aanerud GJ, Aletaha D, Bijlsma JW, Croucher L, et al. European  
24 League Against Rheumatism recommendations for the inclusion of patient  
25 representatives in scientific projects. *Annals of the Rheumatic Diseases*  
26 2011;70(5):722-6.  
27  
28  
29  
30  
31  
32 26. Tugwell P, Boers M. OMERACT conference on outcome measures in rheumatoid arthritis  
33 clinical trials: introduction. *J Rheumatol* 1993;20(3):528-30.  
34  
35  
36  
37 27. Brooks PM, Boers M, Tugwell P. OMERACT III: the "ACT" revisited. *Jrn of Rheum*  
38 1997;24(4):764-5.  
39  
40  
41  
42 28. Wells G, Anderson J, Beaton D, Bellamy N, Boers M, Bombardier C, et al. Minimal  
43 clinically important difference module: summary, recommendations, and research  
44 agenda. *J Rheumatol* 2001;28(2):452-4.  
45  
46  
47 29. Kirwan JR, Carr A, Gluck O, Hewlett S. Proposal for inclusion of a 'Patient's  
48 perceptions' module in OMERACT VI [unpublished], 2000.  
49  
50  
51  
52 30. Quest E, Aanerud GJ, Kaarud S, Collins S, Leong A, Smedeby B, et al. Patients'  
53 perspective. *J Rheumatol* 2003;30(4):884-5.  
54  
55  
56  
57  
58  
59  
60

- 1  
2  
3 31. Brooks PM, Tugwell P, Strand C, Simon L, Boers M. OMERACT 6: International  
4  
5 consensus conference on outcome measures in rheumatology: Introduction. *Jrn of*  
6  
7 *Rheum* 2003;30(4):866-7.  
8  
9  
10 32. Kirwan J. The patient perspective workshop at OMERACT 6: Rationale and methodology  
11  
12 [unpublished preconference paper]. 2002.  
13  
14 33. Tugwell P, Boers M, Brooks P, Simon L, Strand V, Idzerda L. OMERACT: an  
15  
16 international initiative to improve outcome measurement in rheumatology. *Trials*  
17  
18 2007;8:38.  
19  
20  
21 34. Hewlett SA. Patients and clinicians have different perspectives on outcomes in arthritis. *J*  
22  
23 *Rheumatol* 2003;30(4):877-9.  
24  
25 35. Leeb BF, Sautner J, Leeb BA, Fassel C, Rintelen B. Lack of agreement between patients'  
26  
27 and physicians' perspectives of rheumatoid arthritis disease activity changes. *Scand J*  
28  
29 *Rheumatol* 2006;35(6):441-6.  
30  
31  
32 36. Kvien TK, Heiberg T. Patient perspective in outcome assessments--perceptions or  
33  
34 something more? *J Rheumatol* 2003;30(4):873-6.  
35  
36 37. Carr A, Hewlett S, Hughes R, Mitchell H, Ryan S, Carr M, et al. Rheumatology  
37  
38 outcomes: the patient's perspective. *Journal of Rheumatology* 2003;30(4):880-3.  
39  
40 38. Ahlmen M, Nordenskiöld U, Archenholtz B, Thyberg I, Ronnqvist R, Linden L, et al.  
41  
42 Rheumatology outcomes: the patient's perspective. A multicentre focus group  
43  
44 interview study of Swedish rheumatoid arthritis patients. *Rheumatology (Oxford)*  
45  
46 2005;44(1):105-10.  
47  
48  
49 39. Rupp I, Boshuizen HC, Roorda LD, Dinant HJ, Jacobi CE, van den Bos G. Course of  
50  
51 patient-reported health outcomes in rheumatoid arthritis: comparison of longitudinal  
52  
53 and cross-sectional approaches. *J Rheumatol* 2006;33(2):228-33.  
54  
55  
56  
57  
58  
59  
60

- 1  
2  
3 40. Gossec L, Paternotte S, Aanerud GJ, Balanescu A, Boumpas DT, Carmona L, et al.  
4  
5 Finalisation and validation of the rheumatoid arthritis impact of disease score, a  
6  
7 patient-derived composite measure of impact of rheumatoid arthritis: a EULAR  
8  
9 initiative. *Annals of the Rheumatic Diseases* 2011;70(6):935-42.  
10  
11  
12 41. Hewlett S, Cockshott Z, Byron M, Kitchen K, Tipler S, Pope D, et al. Patients' perceptions  
13  
14 of fatigue in rheumatoid arthritis: overwhelming, uncontrollable, ignored. *Arthritis*  
15  
16 *Rheum* 2005;53(5):697-702.  
17  
18  
19 42. Rupp I, Boshuizen HC, Jacobi CE, Dinant HJ, van den Bos GA. Impact of fatigue on  
20  
21 health-related quality of life in rheumatoid arthritis. *Arthritis Rheum* 2004;51(4):578-  
22  
23 85.  
24  
25  
26 43. Repping-Wuts H, Uitterhoeve R, van Riel P, van Achterberg T. Fatigue as experienced by  
27  
28 patients with rheumatoid arthritis (RA): A qualitative study. *Intl J Nursing Studies*  
29  
30 2008;8(45 (7)):995-102.  
31  
32  
33 44. Nikolaus S, Bode C, Taal E, van de Laar MA. Four different patterns of fatigue in  
34  
35 rheumatoid arthritis patients: results of a Q-sort study. *Rheumatology*  
36  
37 2010;49(11):2191-9.  
38  
39  
40 45. Hewlett S, Hehir M, Kirwan JR. Measuring fatigue in rheumatoid arthritis: a systematic  
41  
42 review of scales in use. *Arthritis & Rheumatism* 2007;57(3):429-39.  
43  
44  
45 46. Kirwan JR, Hewlett S. Patient perspective: reasons and methods for measuring fatigue in  
46  
47 rheumatoid arthritis. *J Rheumatol* 2007;34(5):1171-3.  
48  
49  
50 47. Hewlett S, Chalder T, Choy E, Cramp F, Davis B, Dures E, et al. Fatigue in rheumatoid  
51  
52 arthritis: time for a conceptual model. *Rheumatology (Oxford)* 2010.  
53  
54  
55 48. Kirwan JR, Minnock P, Adebajo A, Bresnihan B, Choy E, de Wit M, et al. Patient  
56  
57 perspective: fatigue as a recommended patient centered outcome measure in  
58  
59 rheumatoid arthritis. *J Rheumatol* 2007;34(5):1174-7.  
60

- 1  
2  
3 49. Pincus T, Sokka T. Complexities in the quantitative assessment of patients with rheumatic  
4  
5 diseases in clinical trials and clinical care. *Clin Exp Rheumatol* 2005;23(5 Suppl  
6  
7 39):S1-9.  
8  
9  
10 50. Kirwan JR, Minnock P, Adebajo A, Bresnihan B, Choy E, de Wit M, et al. Patient  
11  
12 perspective: fatigue as a recommended patient centered outcome measure in  
13  
14 rheumatoid arthritis. *Journal of Rheumatology* 2007;34(5):1174-7.  
15  
16 51. Nicklin J, Cramp F, Kirwan J, Greenwood R, Urban M, Hewlett S. Measuring fatigue in  
17  
18 rheumatoid arthritis: A cross-sectional study to evaluate the Bristol Rheumatoid  
19  
20 Arthritis Fatigue Multi-Dimensional questionnaire, visual analog scales, and  
21  
22 numerical rating scales. *Arthritis Care Res (Hoboken)* 2010;62(11):1559-68.  
23  
24 52. Nikolaus S, van de Laar MA. Measuring fatigue in rheumatoid arthritis. *Nat Rev*  
25  
26 *Rheumatol* 2011;7(10):562-4.  
27  
28 53. Repping-Wuts H. Fatigue in patients with rheumatoid arthritis (thesis). Nijmegen  
29  
30 University, 2009.  
31  
32 54. Wolfe F, Hawley DJ, Wilson K. The prevalence and meaning of fatigue in rheumatic  
33  
34 disease. *The Journal of rheumatology* 1996;23(8):1407-17.  
35  
36 55. Tack BB. Fatigue in rheumatoid arthritis. Conditions, strategies, and consequences.  
37  
38 *Arthritis Care & Research* 1990;3(2):65-70.  
39  
40 56. Crosby LJ. Factors which contribute to fatigue associated with rheumatoid arthritis. *J Adv*  
41  
42 *Nurs* 1991;16(8):974-81.  
43  
44 57. Garrett S, Jenkinson T, Kennedy LG, Whitelock H, Gaisford P, Calin A. A new approach  
45  
46 to defining disease status in ankylosing spondylitis: the Bath Ankylosing Spondylitis  
47  
48 Disease Activity Index. *The Journal of rheumatology* 1994;21(12):2286-91.  
49  
50 58. Newman SP. Psychosocial measures in musculoskeletal trials. *J Rheumatol*  
51  
52 1997;24(5):979-84.  
53  
54  
55  
56  
57  
58  
59  
60

- 1  
2  
3 59. Brooks P, McFarlane AC, Newman S, Rasker JJ. Psychosocial measures. *J Rheumatol*  
4  
5 1997;24(5):1008-11.  
6  
7 60. Gladman DD, Mease PJ, Strand V, Healy P, Helliwell PS, Fitzgerald O, et al. Consensus  
8  
9 on a core set of domains for psoriatic arthritis. *The Journal of rheumatology*  
10  
11 2007;34(5):1167-70.  
12  
13 61. Mease P, Arnold LM, Choy EH, Clauw DJ, Crofford LJ, Glass JM, et al. Fibromyalgia  
14  
15 syndrome module at OMERACT 9: domain construct. *The Journal of rheumatology*  
16  
17 2009;36(10):2318-29.  
18  
19 62. Choy EH, Arnold LM, Clauw DJ, Crofford LJ, Glass JM, Simon LS, et al. Content and  
20  
21 criterion validity of the preliminary core dataset for clinical trials in fibromyalgia  
22  
23 syndrome. *The Journal of rheumatology* 2009;36(10):2330-4.  
24  
25 63. Taylor WJ, Schumacher HR, Jr., Baraf HS, Chapman P, Stamp L, Doherty M, et al. A  
26  
27 modified Delphi exercise to determine the extent of consensus with OMERACT  
28  
29 outcome domains for studies of acute and chronic gout. *Annals of the rheumatic*  
30  
31 *diseases* 2008;67(6):888-91.  
32  
33 64. Merkel PA, Aydin SZ, Boers M, Direskeneli H, Herlyn K, Seo P, et al. The OMERACT  
34  
35 core set of outcome measures for use in clinical trials of ANCA-associated vasculitis.  
36  
37 *The Journal of rheumatology* 2011;38(7):1480-6.  
38  
39 65. van Tuyl LH, Smolen JS, Wells GA, Scholte-Voshaar M, Hoogland W, Boers M. Patient  
40  
41 perspective on remission in rheumatoid arthritis. *The Journal of rheumatology*  
42  
43 2011;38(8):1735-8.  
44  
45 66. Boers M, Brooks P, Strand CV, Tugwell P. The OMERACT filter for Outcome Measures  
46  
47 in Rheumatology. *The Journal of rheumatology* 1998;25(2):198-9.  
48  
49 67. Lassere MN, Johnson KR, Boers M, Carlton K, Day RO, de Wit M, et al. Standardized  
50  
51 assessment of adverse events in rheumatology clinical trials: summary of the  
52  
53  
54  
55  
56  
57  
58  
59  
60



- 1  
2  
3 OMERACT 7 drug safety module update. *Journal of Rheumatology*  
4  
5 2005;32(10):2037-41.  
6  
7 68. Bingham CO, 3rd, Alten R, de Wit MP. The importance of patient participation in  
8  
9 measuring rheumatoid arthritis flares. *Annals of the rheumatic diseases* 2012.  
10  
11 69. Kristjansson E, Tugwell PS, Wilson AJ, Brooks PM, Driedger SM, Gallois C, et al.  
12  
13 Development of the effective musculoskeletal consumer scale. *The Journal of*  
14  
15 *rheumatology* 2007;34(6):1392-400.  
16  
17 70. de Wit MPT, Koelewijn-van Loon MS, Collins S, Abma TA, Kirwan JR. How patients  
18  
19 contribute a new voice at a scientific conference: their expectations and experiences at  
20  
21 the Outcome Measures in Rheumatology Conference 2010. (*forthcoming*) 2012.  
22  
23 71. Abma TA, Nierse CJ, Widdershoven GA. Patients as partners in responsive research:  
24  
25 methodological notions for collaborations in mixed research teams. *Qual Health Res*  
26  
27 2009;19(3):401-15.  
28  
29 72. Kjekken I, Ziegler C, Skrolsvik J, Bagge J, Smedslund G, Tovik A, et al. How to develop  
30  
31 patient-centered research: some perspectives based on surveys among people with  
32  
33 rheumatic diseases in Scandinavia. *Physical Therapy* 2010;90(3):450-60.  
34  
35 73. Akerhielm CE. Patient participation in research - A Swedish model. *Ann Rheum Dis*  
36  
37 2009;68(Suppl3):800.  
38  
39 74. Akerhielm CE. Patient research partners - A way to participation and influence in  
40  
41 research. *Ann Rheum Dis* 2010;69(Suppl3):753.  
42  
43 75. Hewlett S. Learnings from the Bristol experience - Practicalities of a decade of patient  
44  
45 involvement in research on a local level. *Ann Rheum Dis* 2010;69((Suppl3)):29.  
46  
47 76. Hewlett S, De Wit M, Richards P, Quest E, Hughes R, Heiberg T, et al. Patients and  
48  
49 professionals as research partners: challenges, practicalities, and benefits. *Arthritis &*  
50  
51 *Rheumatism* 2006;55(4):676-80.  
52  
53  
54  
55  
56  
57  
58  
59  
60

- 1  
2  
3 77. Gossec L, Dougados M, Rincheval N, Balanescu A, Boumpas DT, Canadello S, et al.  
4  
5 Elaboration of the preliminary Rheumatoid Arthritis Impact of Disease (RAID) score:  
6  
7 a EULAR initiative. *Annals of the Rheumatic Diseases* 2009;68(11):1680-5.  
8  
9  
10 78. Stiggelbout AM, Weijden TV, Wit MP, Frosch D, Legare F, Montori VM, et al. Shared  
11  
12 decision making: really putting patients at the centre of healthcare. *BMJ*  
13  
14 2012;344:e256.  
15  
16 79. Beresford P. User involvement, research and health inequalities: developing new  
17  
18 directions. *Health Soc Care Community* 2007;15(4):306-12.  
19  
20  
21 80. Ward PR, Thompson J, Barber R, Armitage CJ, Boote JD, Cooper CL, et al. Critical  
22  
23 perspectives on 'consumer involvement' in health research: Epistemological  
24  
25 dissonance and the know-do gap. *Journal of Sociology* 2009;46(1):63-82.  
26  
27  
28 81. Lindenmeyer A, Hearnshaw H, Sturt J, Ormerod R, Aitchison G. Assessment of the  
29  
30 benefits of user involvement in health research from the Warwick Diabetes Care  
31  
32 Research User Group: a qualitative case study. *Health Expectations* 2007;10(3):268-  
33  
34 77.  
35  
36 82. Broerse JEW, Elberse JE, Caron-Flinterman JFW, Zweekhorst MBM. Enhancing a  
37  
38 transition towards a needs-oriented health research system. In: Broerse JEW, Bunders  
39  
40 JFG, editors. *Transitions in Health Systems: Dealing with persistent problems*.  
41  
42 Amsterdam: VU University Press, 2010:181-205.  
43  
44  
45 83. Schipper K. Patient participation & knowledge [thesis]. VU University, 2011.  
46  
47  
48 84. Jinks C, Ong BN, O'Neill TJ. The Keele community knee pain forum: action research to  
49  
50 engage with stakeholders about the prevention of knee pain and disability. *BMC*  
51  
52 *Musculoskelet Disord* 2009;10:85.  
53  
54  
55  
56  
57  
58  
59  
60

1  
2  
3  
4  
5  
6  
7  
8  
9  
10  
11  
12  
13  
14  
15  
16  
17  
18  
19  
20  
21  
22  
23  
24  
25  
26  
27  
28  
29  
30  
31  
32  
33  
34  
35  
36  
37  
38  
39  
40  
41  
42  
43  
44  
45  
46  
47  
48  
49

Table 1 Characteristics interviewees

|                                      | Professionals                                                                     | Patient Research Partners                                                                       | Interview Code |
|--------------------------------------|-----------------------------------------------------------------------------------|-------------------------------------------------------------------------------------------------|----------------|
| Sex (M:F)                            | 12 : 4                                                                            | 7 : 9                                                                                           |                |
| Professional background or Diagnosis | 10 practicing rheumatologists<br>3 full time researchers<br>3 other professionals | 10 rheumatoid arthritis<br>2 vasculitis<br>2 ankylosing spondylitis<br>1 fibromyalgia<br>1 gout |                |
| Number of                            | 1                                                                                 | 5                                                                                               | 8              |
| OMERACT conferences attended         | 2                                                                                 | 0                                                                                               | 3              |
|                                      | 3                                                                                 | 1                                                                                               | 1              |
|                                      | 4                                                                                 | 4                                                                                               | 4              |
|                                      | ≥5                                                                                | 6                                                                                               | 0              |
| Interview in relation to             | Before                                                                            | 2                                                                                               | 1              |
|                                      | During                                                                            | 8                                                                                               | 16             |

} PG to PN

1  
2  
3  
4  
5  
6  
7  
8  
9  
10  
11  
12  
13  
14  
15  
16  
17  
18  
19  
20  
21  
22  
23  
24  
25  
26  
27  
28  
29  
30  
31  
32  
33  
34  
35  
36  
37  
38  
39  
40  
41  
42  
43  
44  
45  
46  
47  
48  
49

OMERACT

| conference          | After | 6                           | 5                           |
|---------------------|-------|-----------------------------|-----------------------------|
| Geographical spread |       | 6 countries<br>2 continents | 7 countries<br>4 continents |
| Research            |       | 10 Senior Researchers       | RA to RG, RJ, RK, RY        |
| Background          |       | 1 Research Fellow           | RH                          |
|                     |       | 1 Post-doctoral researcher  | RI                          |
|                     |       | 2 Pharma representatives    | DA, DD                      |
|                     |       | 2 Staff members             | DB, DC                      |

For Peer review only

Table 2

Main and sub-categories from the analysis of patient contributions to OMERACT meetings and outcome research since 2002

| IMPACT OF A DECADE OF PATIENT INVOLVEMENT IN OMERACT                                                                                                                                                                        |                                                                                                                                                                                                                                                                 |                                                                                                                                                                                                                                    |                                                                                                                                                                                                    |                                                                                                                                                                            |
|-----------------------------------------------------------------------------------------------------------------------------------------------------------------------------------------------------------------------------|-----------------------------------------------------------------------------------------------------------------------------------------------------------------------------------------------------------------------------------------------------------------|------------------------------------------------------------------------------------------------------------------------------------------------------------------------------------------------------------------------------------|----------------------------------------------------------------------------------------------------------------------------------------------------------------------------------------------------|----------------------------------------------------------------------------------------------------------------------------------------------------------------------------|
| Research Agenda                                                                                                                                                                                                             | Outcome core sets                                                                                                                                                                                                                                               | Patient reported outcomes                                                                                                                                                                                                          | Culture of OMERACT                                                                                                                                                                                 | Consequences outside OMERACT                                                                                                                                               |
| Generating challenging ideas<br><br>Identification of patient-relevant research topics:<br><ul style="list-style-type: none"> <li>• Well being</li> <li>• Fatigue</li> <li>• Sleep disturbance</li> <li>• Flares</li> </ul> | Identification of patient relevant domains to include in core sets for clinical trials:<br><ul style="list-style-type: none"> <li>• Fibromyalgia</li> <li>• Psoriatic Arthritis</li> <li>• Vasculitis</li> <li>• Gout</li> <li>• MRI</li> <li>• MCID</li> </ul> | Acceptable, understandable and feasible outcome measures for<br><ul style="list-style-type: none"> <li>• Monitoring adverse events</li> <li>• Work productivity</li> <li>• Flares</li> <li>• Psychosocial interventions</li> </ul> | <ul style="list-style-type: none"> <li>• Attitudes</li> <li>• Communication</li> <li>• Perceptions</li> <li>• Motivation</li> <li>• Relational empowerment</li> <li>• Personal benefits</li> </ul> | <ul style="list-style-type: none"> <li>• Local initiatives</li> <li>• Local and national networks of partners</li> <li>• EULAR</li> <li>• COMET</li> <li>• ISDM</li> </ul> |

1  
2  
3  
4  
5  
6  
7  
8  
9  
10  
11  
12  
13  
14  
15  
16  
17  
18  
19  
20  
21  
22  
23  
24  
25  
26  
27  
28  
29  
30  
31  
32  
33  
34  
35  
36  
37  
38  
39  
40  
41  
42  
43  
44  
45  
46  
47  
48  
49  
50  
51  
52  
53  
54  
55  
56  
57  
58  
59  
60

|               |                                                               |  |  |  |
|---------------|---------------------------------------------------------------|--|--|--|
|               | <ul style="list-style-type: none"> <li>• Remission</li> </ul> |  |  |  |
| Reality check |                                                               |  |  |  |

For peer review only

## Abbreviations

|         |                                               |
|---------|-----------------------------------------------|
| COMET   | Core Outcome Measures in Effectiveness Trials |
| EULAR   | European League Against Rheumatism            |
| FDA     | USA Food and Drug Administration              |
| ISDM    | International Shared Decision Making          |
| MCID    | Minimal Clinically Important Difference       |
| MRI     | Magnetic Resonance Imaging                    |
| OMERACT | Outcome Measurement in Rheumatology           |
| PRO     | Patient Reported Outcome                      |
| RA      | Rheumatoid Arthritis                          |



**Involving patient research partners has a significant impact on outcomes research: an example from the international OMERACT conferences.**

|                                 |                                                                                                                                                                                                                                                                                                      |
|---------------------------------|------------------------------------------------------------------------------------------------------------------------------------------------------------------------------------------------------------------------------------------------------------------------------------------------------|
| Journal:                        | <i>BMJ Open</i>                                                                                                                                                                                                                                                                                      |
| Manuscript ID:                  | bmjopen-2012-002241.R2                                                                                                                                                                                                                                                                               |
| Article Type:                   | Research                                                                                                                                                                                                                                                                                             |
| Date Submitted by the Author:   | 02-Apr-2013                                                                                                                                                                                                                                                                                          |
| Complete List of Authors:       | Wit, Maarten; VU Medical Centre , Metamedica<br>Abma, Tineke; VU Medical Centre, Metamedica<br>Koelewijn-van Loon, Marije; Maastricht University Medical Centre,<br>Department of General Practice<br>Collins, Sarah; Patient Research Partner,<br>Kirwan, John; University of Bristol, Rheumatology |
| <b>Primary Subject Heading</b>: | Rheumatology                                                                                                                                                                                                                                                                                         |
| Secondary Subject Heading:      | Qualitative research, Patient-centred medicine                                                                                                                                                                                                                                                       |
| Keywords:                       | HEALTH IMPACT ASSESSMENT, QUALITATIVE RESEARCH, RHEUMATOLOGY                                                                                                                                                                                                                                         |
|                                 |                                                                                                                                                                                                                                                                                                      |

SCHOLARONE™  
Manuscripts



1  
2  
3 **Involving patient research partners has a significant impact on outcomes**  
4  
5 **research: an example from the international OMERACT conferences.**  
6  
7  
8  
9

10  
11 **Authors:**

12  
13 Wit, Maarten<sup>1</sup>; Abma, Tineke<sup>2</sup>; Koelewijn-van Loon, Marije<sup>2</sup>; Collins, Sarah<sup>3</sup>; Kirwan, John<sup>4</sup>  
14  
15

16  
17 **Affiliations:**

- 18  
19  
20 1. VU Medical Centre - Metamedica

21 Van der Boechorststraat 7 , Amsterdam 1081 BT Netherlands  
22  
23

- 24 2. Maastricht University Medical Centre - Department of General Practice

25 Maastricht Netherlands  
26  
27

- 28 3. Patient Research Partner

29 Surrey United Kingdom  
30  
31

- 32 4. University of Bristol - Rheumatology

33 Rheumatology Unit Bristol Royal Infirmary , Bristol BS2 8HW  
34  
35

36 United Kingdom  
37  
38  
39  
40  
41

42 **Keywords:** HEALTH IMPACT ASSESSMENT , QUALITATIVE RESEARCH,  
43  
44 RHEUMATOLOGY  
45  
46  
47  
48  
49  
50  
51  
52  
53  
54  
55  
56  
57  
58  
59  
60

## Article Summary

### Article focus

- Since 2002 patients have participated as collaborative partners in the biannual conference on Outcome Measures in Rheumatology (OMERACT).
- Although the contribution of patients has been praised and there is a wide-spread call for scientific publications on the impact of engaging with patients, no systematically obtained evidence has been published to support the idea that structural involvement of patients in research conferences is beneficial.
- Our qualitative study reports the combined results of a thematic document analysis and 32 semi structured interviews with all stakeholders including researchers, patient participants and representatives from pharmaceutical industry and international regulators.

### Key messages

- Long term engagement with arthritis patients in OMERACT conferences has significantly influenced outcome research in the field of rheumatology.
- Patients have successfully contributed to the research agenda of OMERACT by identifying new domains that are important for patients, and provided the patient perspective in the development of core outcome measurement sets and the development of patient reported outcome measures.

### Strengths and limitations of this study

- Triangulation of the combined review of the document analysis and interviews, together with the active involvement of all team members representing a variety of perspectives in the phase of data analysis and interpretation, have enhanced the validity of the study.

1  
2  
3  
4  
5  
6  
7  
8  
9  
10  
11  
12  
13  
14  
15  
16  
17  
18  
19  
20  
21  
22  
23  
24  
25  
26  
27  
28  
29  
30  
31  
32  
33  
34  
35  
36  
37  
38  
39  
40  
41  
42  
43  
44  
45  
46  
47  
48  
49  
50  
51  
52  
53  
54  
55  
56  
57  
58  
59  
60

- The unique context of the OMERACT conferences may limit the generalizability of the results so comparable evaluation studies in other conference formats would be worthwhile.

For peer review only

1  
2  
3 Incorporating the patient perspective in health care research is strongly promoted by policy  
4 makers,<sup>1-4</sup> funding bodies and international regulators. Many theoretical benefits from patient  
5 involvement in research have been reported,<sup>5-8</sup> such as improving the relevance of research  
6 questions, improving recruitment of study participants, and increasing chances for funding  
7 and dissemination of results. In addition there is an increasing recognition of the essential role  
8 of patients in outcome research.<sup>9</sup> The USA Food and Drug Administration (FDA) has made  
9 patient involvement mandatory in the process of the development of patient reported outcome  
10 measures<sup>10 11</sup> and in the context of COMET (Core Outcome Measures in Effectiveness Trials)  
11 patient contributions are seen as crucial in defining domains that are relevant to include in  
12 core outcome measurement sets for clinical trials.<sup>12</sup> Development of core outcome sets might  
13 lead to less variety of incomparable and inappropriate outcome measures, more patient  
14 oriented endpoints and less bias by selective reporting of only positive or statistically relevant  
15 outcomes.<sup>13</sup> Core outcome measurement sets may ease the work of systematic reviewers in  
16 synthesizing the results of multiple studies.<sup>14 15</sup> The question is however whether these  
17 theoretical benefits of patient involvement in outcome research make any difference in  
18 practice.

19  
20  
21  
22  
23  
24  
25  
26  
27  
28  
29  
30  
31  
32  
33  
34  
35  
36  
37  
38  
39  
40  
41  
42  
43  
44  
45  
46  
47  
48  
49  
50  
51  
52  
53  
54  
55  
56  
57  
58  
59  
60

The international group Outcome Measures in Rheumatology (OMERACT), which defines core outcome measurement sets in rheumatic diseases, first included patient participants at its 6<sup>th</sup> bi-annual conference in 2002 and has continued to do so. This provides an opportunity to analyse the consequences and address the important question of whether patient participation has resulted in any demonstrable impact on the nature of its research activity.

Patient involvement in OMERACT has been presented as beneficial and the 2002 conference report concluded that “the preliminary success of this forum” was the basis for “continued and possibly expanded patient participation at the next OMERACT meeting”.<sup>16</sup>

1  
2  
3 Two conferences later others perceived the involvement of patients as “indicative of the  
4 beginning of a paradigm shift in thinking about RA outcomes over the last 5 years”.<sup>17</sup> Since  
5 then OMERACT has formulated three principles recognising the essential role of patients in  
6 outcome research.<sup>18</sup> First, patients’ input is indispensable when defining relevant outcome  
7 measures, identifying domains that are important from the perspective of patients, and  
8 assessing feasibility of measurement tools. Second, structural involvement of patients during  
9 the whole research process provides face validity. Third, OMERACT intends “to ground  
10 theoretical discussions in the lived experience of arthritis, and in concepts which can be  
11 readily communicated to patients to help with therapeutic decision making”.<sup>18</sup>  
12  
13  
14  
15  
16  
17  
18  
19  
20  
21  
22

23 However, the validity of these arguments has never been substantiated by robust evidence  
24 for the effectiveness of patient participation in OMERACT and it is not clear whether or how  
25 this involvement has influenced methodologies, procedures, attitudes, and research outcomes.  
26 Therefore, the objective of this study is to describe and evaluate the contributions made by  
27 patients since OMERACT started implementing structural patient participation in its  
28 conferences. We review the impact of patients on the research agenda and the development of  
29 patient reported outcomes (PRO’s) and explore how including patients has influenced the  
30 culture and structure of the OMERACT conference  
31  
32  
33  
34  
35  
36  
37  
38  
39  
40  
41  
42

### 43 **Method**

44 Patient participation in research is a new phenomenon and often not reported or reflected on  
45 in scientific publications. This lack of written sources in the scientific literature complicates  
46 the study of the process and impact of patient participation through a review of relevant  
47 literature. A provisory search using Pubmed (March 2010) for the terms “patient  
48 participation” OR “patient involvement” OR “user involvement” OR “consumer  
49 involvement” AND “OMERACT” did not generate any relevant reference. Therefore we  
50  
51  
52  
53  
54  
55  
56  
57  
58  
59  
60

1  
2  
3 conducted a content analysis of relevant documents (any written material on the topic of  
4  
5 patient participation).  
6

7 Documents are a stable, rich source of contextual information, providing well-grounded  
8  
9 data on events or situations at low costs. A sound document analysis is rule-bound,  
10  
11 systematic, following a coding process where raw data are aggregated into units describing  
12  
13 the content.<sup>19</sup> We included OMERACT conference proceedings as published by The Journal  
14  
15 of Rheumatology (1992-2010) and 'grey literature' such as correspondence, invitations,  
16  
17 session reports, e-mails and OMERACT policy documents. The review focused on the  
18  
19 arguments, reception and evolution of patient involvement in OMERACT conferences and the  
20  
21 contributions made by patients.  
22  
23

24  
25 Subsequently a responsive evaluation took place during OMERACT 10 (Malaysia, 2010)  
26  
27 using qualitative interviews with representatives of stakeholders. Responsive evaluation is  
28  
29 grounded in the hermeneutic research tradition and is used by social scientists to interpret  
30  
31 meanings that participants attribute to a phenomenon, here the history and impact of a decade  
32  
33 of patient participation from the perspective of the conference delegates. It samples all  
34  
35 stakeholders and does not seek consensus, but respects the plurality of opinions, values and  
36  
37 interests. This ensures that no perspective is omitted as the result of an imbalance of power.<sup>20</sup>  
38  
39

40  
41 The first author (MW) has been involved in OMERACT since 2002 as a patient  
42  
43 participant. He has a rheumatic condition and has been educated as a responsive researcher.  
44  
45 Characteristics for a responsive researcher are a multiple partiality and the intent to enhance  
46  
47 mutual understanding among all stakeholders. The last author (JK) has been involved in  
48  
49 OMERACT since the first conference (1992) and has been the leader of the patient  
50  
51 perspective workshop between 2002-2012. Having witnessed the involvement of patients  
52  
53 firsthand from the very beginning MW and JK provided useful information to start the  
54  
55 research, yet it also alerted them to critically reflect how this engagement influenced the  
56  
57  
58  
59  
60

1  
2  
3 research, and how to prevent bias. Therefore two independent experts (TA, MK) were added  
4  
5 to the team. They had no relations with the OMERACT conference and its participants, and  
6  
7 TA acted as peer-debriefer discussing dilemmas and challenging methodological decisions  
8  
9 with MW.<sup>21</sup>  
10

11 The first author held 32 semi-structured interviews before, during and after the 10<sup>th</sup>  
12  
13 conference (Table 1) and included senior (n=10) and junior researchers (n=2), representatives  
14  
15 of pharmacological industry and regulators (n=2), conference staff (n=2), new patient  
16  
17 participants (n=8) and experienced patient participants (n=8). The interviewees were invited  
18  
19 and informed by e-mail. The patient participants were aware of the purpose of the study  
20  
21 through a one page announcement in the pre-conference patient pack and were asked for  
22  
23 informed consent. In the Netherlands no ethical approval is required for non-intrusive  
24  
25 interviews only.  
26  
27  
28

29 Twenty-eight interviews were recorded, transcribed by an independent secretariat and  
30  
31 subjected to a responder check. Three interviews were summarized in a report, one interview  
32  
33 took place without protocol and, on request of the interviewee, without recording (PF). One  
34  
35 interview was done through Skype (PP). The average duration of the interviews was over 50  
36  
37 minutes, most of them taking place in the humid open lobby of the conference resort. Twenty-  
38  
39 four interviews were held in English of which six was not the native language. Eight  
40  
41 interviews were in Dutch.  
42  
43  
44

45 The interview protocols were slightly different for professionals, new patients and  
46  
47 experienced patients. The topics were not only derived from the document analysis but also  
48  
49 from four pilot interviews and the personal knowledge of MW and JK and the expertise of  
50  
51 TA. The topics dealt with: the expected role of patient participants, their selection, preparation  
52  
53 and support, and the expected or provided contribution to the OMERACT conference.  
54  
55 'Fatigue' was added as a potential probe because publications had already shown that this  
56  
57  
58  
59  
60

1  
2  
3 topic deserved special attention with regard to our research questions.<sup>22-24</sup> Participants with  
4  
5 long term experience in OMERACT were asked retrospectively to describe their memories of  
6  
7 the discussions and decisions taken about patient participation before and after 2002. Their  
8  
9 recollections might be characterized as ‘oral history’.  
10

11  
12  
13  
14 *Selection of interviewees* - At OMERACT 10 a total of 172 delegates participated, 152  
15  
16 professionals and 20 patients. Nine patients attended the conference for the first time. All  
17  
18 interviewees, except for one patient participant from the hosting country, were selected by  
19  
20 MW and JK following an emergent purposive sampling approach.<sup>21</sup> They used a list of  
21  
22 attendees provided by the congress agency, covering four out of five criteria found to be  
23  
24 important (stakeholder background, gender, geographical spread and number of OMERACT  
25  
26 conferences attended). The criterion ‘opinion about patient involvement’ was assessed on the  
27  
28 basis of authors’ insight of the participant as being ‘positive’ (e.g. contributing to the patient  
29  
30 perspective workshop or involving partners in own activities), ‘indifferent’ or ‘skeptical’ (e.g.  
31  
32 resistant, not collaborating with partners). When it became clear during the process of data  
33  
34 collection that certain criteria were not well covered new participants were approached till  
35  
36 maximum variation was realized. For example, two interviewees who were chosen because  
37  
38 of their previously reported criticism of involving patients, showed a considerable change in  
39  
40 perception of patient involvement in a positive way. For this reason two more interviews with  
41  
42 professionals who had expressed critical comments during the last conference were arranged.  
43  
44 Finally, to ensure the opinions of young investigators, two OMERACT Fellows were  
45  
46 approached, one undertaking a PhD in translational research and one post doctoral researcher  
47  
48 active in clinical research.  
49  
50  
51  
52

53  
54 Saturation was defined as a repetition of data; theoretical saturation as achieving  
55  
56 sufficiently robust empirical data to support and describe the identified themes and main  
57  
58  
59  
60



1  
2  
3 categories. Saturation was discussed and agreed within the research team. In total the  
4  
5 perceptions and experiences of 16 patient participants and 16 professionals were collected  
6  
7 (Table 1).  
8  
9

10  
11 [insert Table 1]  
12  
13

14  
15  
16 *Data-analysis* - A thematic content analysis focused in particular on the reported  
17  
18 contributions attributed to patient participants. Coding of the interviews was done separately  
19  
20 by MW and an independent second coder (MK) who had never worked with active patient  
21  
22 involvement before. This resulted in 211 detailed codes that were then combined into 27 sub-  
23  
24 categories. During several meetings, the project team, representing various backgrounds,  
25  
26 discussed the codes and subcategories from a variety of perspectives, and sought natural  
27  
28 groupings or categories within the data. Triangulation was used in two different meanings:  
29  
30 First, as a means of verifying findings against another source (interview) or another method  
31  
32 (document analysis) and to enhance the validity of the data. Second, as a means to enrich the  
33  
34 data collection and improve the face-validity by synthesizing findings from the document  
35  
36 analysis with the personal memories and experiences of respondents who looked back in time.  
37  
38 By doing so, gaps in the document analysis could be filled in.  
39  
40  
41

42  
43 The relevance and validity of the analysis and interpretation of the data was increased by the  
44  
45 involvement of an external expert in qualitative health research (TA) as well as by inviting  
46  
47 one of the patients (SC) who attended OMERACT 10 for the first time to join the research  
48  
49 team. As a patient research partner<sup>25</sup> she was involved in the coding, data analysis and data  
50  
51 interpretation to guarantee the patient perspective. To protect the anonymity of the  
52  
53 participants all quotes are presented in the “she”-form. Quotes of professional researchers are  
54  
55 indicated by ‘R’ and those of patient research partners (in short: ‘partners’) by ‘P’.  
56  
57  
58  
59  
60

## Results

### History of patient involvement at OMERACT

OMERACT started in 1992 as an initiative to overcome the problem of widespread and inconsistent use of many different outcome measures in rheumatoid arthritis (RA) clinical trials. The objective was to improve “the accuracy and responsiveness to change of clinically relevant (to patient and clinician) endpoints”.<sup>26</sup> Rheumatologist from many countries met in Maastricht and achieved consensus on a core set of outcomes for RA. The RA core set was endorsed by the WHO.<sup>27</sup> The initial stand alone conference was sufficiently successful that it was followed by conferences in alternate years continuing the discussion and consensus building about new core sets for other rheumatic diseases and new measurement instruments.

During the fifth OMERACT conference (2000) participants discussed the concept of a minimum clinically important difference (MCID). Based on methodological arguments a growing interest in patient reported outcomes emerged, culminating in a spontaneous proposal at the final session to invite patients to the next conference. All participants voted in favour of this proposal.<sup>28</sup> The chair of the conference felt confident about the proposal because it had been discussed in the organising committee before, although no decisions had been taken. Participants of the MCID module argued that patient perspectives should be explored further<sup>29</sup> and took responsibility for identifying 11 patients to join OMERACT 6 and to review the RA core set.

Our document analysis revealed the unconditional positive reception of patient delegates at OMERACT conferences, and partners confirmed that concerns regarding their involvement were misplaced. They felt their reception was extremely welcoming. “There was a tangible

1  
2  
3 feeling of relief and a belief that patients' views and opinions would be listened to and  
4  
5 incorporated into the deliberations".<sup>30</sup> Also the organizers were excited and called the patient  
6  
7 involvement "a tremendous success".<sup>31</sup>  
8

9  
10 Between 2002 and 2012 a total of 57 partners with different rheumatic diseases have  
11  
12 participated as full delegates with equal voting rights.<sup>32</sup> Their role and contributions have  
13  
14 developed over time. At the first conference (2002) they formed an homogeneous group of  
15  
16 people with RA with little or no experience in scientific research. The level of involvement in  
17  
18 the conference in general was relatively low, support was not organized and the number of  
19  
20 sessions patients attended was limited. Contributions centred on participation in the workshop  
21  
22 discussions about the severity of fatigue and the definition of low disease activity, although  
23  
24 there was a keynote speech at the opening ceremony.<sup>30</sup> In contrast, by OMERACT 11 (2012)  
25  
26 the partners were a heterogeneous group with different rheumatic conditions and different  
27  
28 levels of experience, competences and cultural background. They received a pre-conference  
29  
30 information pack and were actively supported by a pre-conference dinner, a glossary, training  
31  
32 sessions and a buddy system. They carried out a variety of tasks similar to professionals such  
33  
34 as giving plenary presentations, co-chairing breakout sessions, reporting back from breakout  
35  
36 sessions and preparing consensus statements. Several partners became co-authors of peer-  
37  
38 reviewed publications.  
39  
40  
41  
42  
43  
44

#### 45 **Patient contributions to OMERACT meetings and outcome research**

46  
47 Interviewees reported a variety of contributions made by partners during the conference  
48  
49 where they are an integral part of the deliberative and consensus-building process.<sup>18</sup> These  
50  
51 examples are presented below and compared with the document analyses when appropriate.  
52  
53 Because research in the domain of fatigue has been reported as the most illustrative example,  
54  
55 the contributions in this area will be described in more detail. Using the methodology  
56  
57  
58  
59  
60

1  
2  
3 described above we identified 5 main categories from the comments made during the  
4  
5 interviews with OMERACT participants (Table 2): Contributions to the research agenda; The  
6  
7 development of core sets; The development of patient reported outcomes (PRO's); The  
8  
9 culture of OMERACT; Consequences outside OMERACT. Finally we will highlight some of  
10  
11 the challenges that emerged from the interviews.  
12

13  
14  
15  
16 ***Contributions to the research agenda*** - From the very beginning partners had a significant  
17  
18 influence on the research agenda in the field of rheumatology by participating in OMERACT  
19  
20 workshops and small group discussions. They identified new outcome domains that are  
21  
22 relevant from their perspective.<sup>33</sup> The first Patient Perspective Workshop, attended by 11  
23  
24 patient participants and 41 professionals, focused on the development of “valid outcome  
25  
26 instruments that incorporate the perspective of the patient and to prepare the evidence and  
27  
28 arguments for their inclusion in the (RA) core set”<sup>24</sup>. The preconference paper pointed out the  
29  
30 methodological and political challenges: How to elicit and incorporate preferences of patients  
31  
32 in RCT's? <sup>32</sup> The workshop had been specifically arranged to support the partner  
33  
34 contributions including a pre- and post-workshop meeting. The workshop identified  
35  
36 subjective experiences of RA, not encompassed in the RA core set but important  
37  
38 consequences of the disease: a sense of well being, fatigue, and disturbed sleep.<sup>24</sup>  
39  
40  
41  
42

43 After the first conference attended by partners, it became apparent that perspectives of  
44  
45 professionals and patients differ and more research was needed to articulate patients  
46  
47 priorities.<sup>34-37</sup> Partners emphasized the need for an holistic approach to people with arthritis.<sup>30</sup>  
48  
49 The acknowledgement of the discordance of perspectives initiated new studies looking into  
50  
51 the preferences, opinions and experiences of people with rheumatic diseases <sup>22 38 39</sup> and  
52  
53 developing patient-derived core sets.<sup>40</sup> This made participants more aware of the emerging  
54  
55 patient perspective: “the whole realm of things we haven't looked at” [RA]. New topics  
56  
57  
58  
59  
60

1  
2  
3 emerged: remission, pain, flares and foot problems. One interviewee clearly stated that  
4  
5 partners “inspired me for new projects to study the variety in new productivity outcome  
6  
7 measures” [RK].  
8  
9

10  
11 ***Case-study of fatigue*** - Since 2002 when partners identified new topics for research, studies  
12  
13 have been initiated with firm involvement of partners in the field of sleep disturbances, flares  
14  
15 and well being. The most progress has been made in fatigue, and the emergence of fatigue as  
16  
17 a relevant outcome measure in RA provides an illustrative case history. When asked for the  
18  
19 greatest benefit of including partners in OMERACT conferences interviewees unanimously  
20  
21 confirmed that the topic of fatigue would not have been on the research agenda without  
22  
23 partners expressing their concerns about fatigue as an often neglected symptom of their  
24  
25 disease and without the listening of receptive professionals. One of the partners attending  
26  
27 OMERACT 6 recalled:  
28  
29  
30  
31

32  
33  
34 “I can’t remember who brought up the subject, but someone mentioned fatigue. And that  
35  
36 was the occasion when one of the other delegates said ‘well, everybody gets tired’. One  
37  
38 patient shot to her feet and said ‘no, it’s not, it’s not like anything you’ve ever  
39  
40 experienced; it’s not tiredness; it’s a complete wipe-out’.” [PM]  
41  
42  
43  
44

45 Early descriptions of fatigue at OMERACT 6 and 7 led to substantial qualitative and  
46  
47 quantitative research. The first studies investigated the prevalence and severity of fatigue in  
48  
49 RA and how patients describe their fatigue.<sup>41-44</sup> The next step comprised a systematic review  
50  
51 of measurement instruments for fatigue<sup>45</sup> that explored the rigor of existing measurement  
52  
53 tools and the need to develop patient-derived instruments that are trustworthy, capturing  
54  
55 concepts and language of patients. Furthermore a standardized visual analogue scale,  
56  
57  
58  
59  
60

1  
2  
3 opportunities for electronic gathering of data and exploring mechanisms of fatigue that could  
4  
5 guide researchers in the development of effective interventions, were added to the research  
6  
7 agenda. New data, presented at OMERACT 8 (2006) showed that fatigue is not a  
8  
9 consequence of RA, but an independent variable that adds new information to the existing RA  
10  
11 core set.<sup>46 47</sup> This new perception resulted in the acceptance of fatigue as an important  
12  
13 outcome for clinical trials.<sup>48 49</sup> Fatigue was subsequently added to the RA core set as a  
14  
15 recommended outcome.<sup>50</sup>

16  
17  
18 More powerful instruments for measuring fatigue in RA have since been devised and  
19  
20 validated, starting from the perspective of the patients.<sup>51 52</sup> Outside OMERACT researchers  
21  
22 initiated similar studies, focusing on the communication between patients and health  
23  
24 professionals in the consultation room.<sup>53</sup>

25  
26  
27  
28  
29 The thematic document analysis provided additional evidence for the statement that without  
30  
31 patients raising their voice at OMERACT 6 fatigue would not have been high on the research  
32  
33 agenda. The issue of fatigue was not new for rheumatologists.<sup>54-56</sup> Fatigue was a symptom  
34  
35 regularly reported during clinical consultations, but not incorporated in guidelines for  
36  
37 monitoring and managing. Fatigue in ankylosing spondylitis was identified by physicians and  
38  
39 incorporated in a disease status questionnaire.<sup>57</sup> And during OMERACT 3 (1996) delegates  
40  
41 carried out a ranking exercise trying to prioritize psychosocial measures in musculoskeletal  
42  
43 diseases. The discussion groups identified outcomes such as pain, depression, anxiety and  
44  
45 fatigue as major concerns.<sup>58</sup> For fatigue eight examples of measurement instruments were  
46  
47 given.<sup>59</sup> However, after this workshop, nothing happened for six years, until patients raised  
48  
49 the urgency of fatigue as a serious symptom.  
50  
51  
52  
53  
54  
55  
56  
57  
58  
59  
60

1  
2  
3 Retrospectively, professionals admitted they had a blind spot for fatigue in RA and only  
4  
5 hearing from partners at OMERACT made them change their perception of fatigue as an  
6  
7 important outcome:  
8  
9

10  
11 “Because when I was working in oncology before, during university training, of course  
12  
13 we saw that the patients were lying in bed all day and we knew they were exhausted, call  
14  
15 that fatigue. But patients with RA, we were ignorant.” [RC]  
16  
17  
18  
19

20  
21 Another physician, involved in OMERACT from the start:  
22  
23  
24

25 “We were first discussing on fatigue and to be honest: I never ever had before heard of  
26  
27 fatigue being a problem in rheumatology. So it got into my mind and then I got thinking  
28  
29 about it and then, when I was back, I asked patients if they felt fatigue and I got nearly a  
30  
31 100% positive response. So it was like a coming out, you know. I listened to the patients  
32  
33 before but bringing it to a specific topic, that was really what I learned at OMERACT.”  
34  
35  
36 [RA]  
37  
38  
39  
40

41 [Insert Table 2]  
42  
43  
44

45 ***The development of core outcome measurement sets and patient reported outcomes –***  
46

47 During the first two conferences including patients the focus of partners’ contributions was on  
48  
49 agenda-setting and identifying relevant outcomes for clinical trials. Then, partners became  
50  
51 gradually involved on different levels in other OMERACT activities, varying from being  
52  
53 consulted (e.g. in a Delphi process) to full collaboration (as partner and as co-author). They  
54  
55 contributed by identifying domains that are relevant for disease-specific core sets for psoriatic  
56  
57  
58  
59  
60

1  
2  
3 arthritis,<sup>60</sup> fibromyalgia,<sup>61 62</sup> gout<sup>63</sup> and vasculitis.<sup>64</sup> Furthermore they contributed to the  
4  
5 development of core outcome measurement sets for methodological or clinical concepts such  
6  
7 as MCID and remission.<sup>65</sup> Partners have also played a role in the assessment of the feasibility  
8  
9 of instruments and core sets, one of the three key components of the OMERACT Filter.<sup>66</sup>  
10

11  
12 Partners have been helpful in the development of PRO measurement instruments in the  
13  
14 field of work productivity, monitoring adverse events,<sup>67</sup> flares<sup>68</sup> and psychosocial  
15  
16 interventions such as self-management programs<sup>69</sup>. At the 2010 conference, during the  
17  
18 plenary session on flares in RA, one of the partners gave a personal testimony about the  
19  
20 devastating impact of the unpredictable nature of RA. A professional in the audience was  
21  
22 surprised and reported: “It demonstrates that the disease activity fluctuates more than we can  
23  
24 see in our data: Our instruments are more flat, and by the limited frequency of measuring we  
25  
26 filter fluctuations out”. [RI]  
27  
28  
29  
30

31  
32 Regulators require strong evidence for the effectiveness of new medicines by demonstrating  
33  
34 accurately that they reduce structural progression as well as patient important outcomes. By  
35  
36 doing both of these, developing standards for high quality imaging techniques and exploring  
37  
38 new PRO’s and translating them into valid and feasible measures, OMERACT has been  
39  
40 extremely advantageous for the negotiations with regulators about the registration and  
41  
42 relatively generous reimbursement of new biologic agents:  
43  
44  
45  
46

47  
48 “I think, to be really honest, the patient involvement process in OMERACT and the  
49  
50 changes in outcome measurements and the use of them in the drug tests has made a  
51  
52 real difference for so many patients.” [RB]  
53  
54  
55  
56  
57  
58  
59  
60



1  
2  
3 *The culture of OMERACT*– In spite of the initial unanimous vote to invite patients, some  
4  
5 researchers were concerned about changing the layout of the conference:  
6  
7

8  
9  
10 “My original expectation of a limited contribution was based on fear that patients were  
11  
12 not able to transcend their personal experience and to generalize ... new stakeholders  
13  
14 often don’t have knowledge about clinometric.” [RE]  
15  
16

17  
18 In retrospect researchers explained that they deferred to the proposal in order to reflect a core  
19  
20 principle of OMERACT of not immediately rejecting new ideas: “To respect and listen rather  
21  
22 than just react”. [RA]  
23  
24

25 Looking back, the number of professional participants who were in favour of partners  
26  
27 at the conference slowly increased: “I was impressed by the very good working flow”. [RC]  
28  
29 Participants confirmed that the presence of partners has changed their way of thinking and  
30  
31 talking. “They made my blind spot visible” [RK] and another professional reported:  
32  
33  
34  
35

36 “Now what we have found is, and I changed my view, [be]cause it wasn’t only from  
37  
38 OMERACT. As I got to know more and more patients, I realized, this sounds stupid  
39  
40 because it’s so obvious but it wasn’t obvious to me, that a patient isn’t their disease. A  
41  
42 patient is a person who happens to have a disease. What a big difference. Because if  
43  
44 you’re a person that happens to have a disease, then for example you might have  
45  
46 incredible skills in an area that might be very useful to move a clinical trial forward.  
47  
48 So once I came to that realization then patient involvement becomes an absolutely  
49  
50 obvious and integral part of moving forward.” [RA]  
51  
52  
53  
54  
55  
56  
57  
58  
59  
60

1  
2  
3 Partners improved communication and brought dynamics to the dialogue because they are  
4 motivated and constructive, without a personal agenda. At a conference such as OMERACT,  
5 where the discussion about methodology may become extremely technical, partners reminded  
6 participants of the common goal of the conference by providing a human face of a person  
7 living with the condition day by day. Their presence made participants more explicit about the  
8 objectives of sessions and more explanatory about terms and concepts under discussion.  
9  
10 Together with a reduced use of jargon this ‘forced’ simplification resulted in fewer  
11 misunderstandings for everyone.  
12  
13  
14  
15  
16  
17  
18  
19

20  
21 For some professionals the presence of partners complicated the communication.  
22 Some believed that partners slow down the process because they are not familiar with  
23 technical issues. Others felt disinclined to say what they wanted to out of respect to partners  
24 or hesitated to criticize them. One researcher felt embarrassed in the presence of partners and  
25 put her own expertise aside to keep things simple: “Patients didn’t sometimes understand the  
26 objective of the research, which hindered us”. [RK] One of the partners admitted that “it is a  
27 thin line between providing input and causing irritation”. [PN]  
28  
29  
30  
31  
32  
33  
34  
35  
36  
37

38 An analysis of the responses of patients attending OMERACT for the first time showed that  
39 new partners experienced a significant learning curve and a variety of personal benefits.<sup>70</sup>  
40 Results from this study suggest that in fact all participants learned from the contact with other  
41 stakeholders. During this process participants gained trust, respect and understanding,  
42 reflecting the emergence of relational empowerment.  
43  
44  
45  
46  
47  
48  
49  
50

51  
52 “Patients were a kind of sparring partner when I entered a relatively new area. That  
53 was fun and did clarify a lot”. [RK]  
54  
55  
56  
57  
58  
59  
60

1  
2  
3 Relational empowerment in the context of health research can be understood as a process in  
4  
5 which traditional doctor-patient relationships transform into equal partnerships enabling  
6  
7 mutual learning processes.<sup>71</sup> All participants become stronger by sharing knowledge and  
8  
9 responsibilities, and educating and helping each other.  
10

11  
12 The reported benefits were easiest to identify at the beginning when the level of  
13  
14 involvement was still low. They became more diffuse when partners were structurally  
15  
16 involved as full and equal collaborators. One interviewee mentioned “a reality check” as an  
17  
18 important benefit of partners attending the conference. For professionals it offered the  
19  
20 opportunity to check the relevance of the scope of their research: Are we doing the right  
21  
22 things according to patients and are we using the right tools and methods? It is a belief of  
23  
24 professionals that this kind of feedback is important to legitimize their research and, together  
25  
26 with the belief of partners that without this research no innovations will take place, it  
27  
28 strengthened the mutual empowerment of both.  
29  
30  
31  
32  
33

34 ***Consequences outside OMERACT*** – The lessons learnt at OMERACT were noticed by the  
35  
36 outside world. Partners returning home after the conference have continued introducing  
37  
38 patient participation in local and national research projects or established networks of patient  
39  
40 research partners.<sup>72-75</sup> Some delegates published a working framework for incorporating the  
41  
42 patient perspective in outcome research.<sup>76</sup> With the input from several OMERACT  
43  
44 participants the European League Against Rheumatism (EULAR) developed  
45  
46 recommendations for the inclusion of patient representatives in scientific projects.<sup>25</sup>  
47  
48 Following these recommendations a new patient reported quality of life instrument for RA  
49  
50 was developed and validated.<sup>40 77</sup> Based on the experiences of OMERACT the organizing  
51  
52 committee of the 6<sup>th</sup> International Shared Decision Making conference decided in 2011 to  
53  
54 invite patient participants.<sup>78</sup> In the same year OMERACT delegates, partners as well as  
55  
56  
57  
58  
59  
60

1  
2  
3 professionals, participated in the 2<sup>nd</sup> Core Outcome Measures in Effectiveness Trials  
4 (COMET) conference, demonstrating how the OMERACT methodology can be utilized in  
5  
6  
7 other disease areas.<sup>12</sup>  
8  
9

10  
11 ***Remaining challenges emerging from the interviews*** – The role and contribution of patient  
12 participants have changed over time and procedures for patient selection and support have  
13  
14 been developed in order to identify patient participants who are able to make a difference.  
15  
16 There is still a debate going on whether patients should be selected through strict criteria such  
17  
18 as education, communication skills, attitude and familiarity with scientific research. Some  
19  
20 argue that an expert meeting like OMERACT needs expert patients who have extended  
21  
22 knowledge about methodologies of outcome research, and are able to provide a kind of  
23  
24 aggregated patient input. At OMERACT this group represents a minority of delegates, who  
25  
26 are reluctant to allocate the same rights and power to partners as to the professionals. The vast  
27  
28 majority believes that many patients are able to contribute to an OMERACT conference and  
29  
30 emphasizes that a heterogeneous group of partners in age, gender, condition, experience and  
31  
32 cultural background are advantageous for the conference. They intend to develop full  
33  
34 representative participation in all phases of research by including partners in working group  
35  
36 activities between conferences. Finally, some participants point out the potential risks of  
37  
38 partners who become too experienced. They appreciate the naive input as a patient, with a  
39  
40 minimum of preparation and reflection. They assume that as soon as you start thinking about  
41  
42 your contribution, you lose the unique, individual perspective and become a patient-expert  
43  
44 who aligns too easily with professionals.  
45  
46  
47  
48  
49  
50

51  
52 Professionals shared the opinion that partners need training, although they reported  
53  
54 different ideas about the content and aims of such training. Experienced partners as well as  
55  
56 novice researchers felt that any new participant has to learn the OMERACT objectives,  
57  
58  
59  
60

1  
2  
3 culture and procedures first, before they can become fully productive, mostly at the second or  
4  
5 third conference. This accords with the expectations of partners who attended OMERACT for  
6  
7 the first time.  
8  
9

### 10 11 12 **Overview of findings**

13  
14 These results show that a decade of patient involvement has been successful and had a  
15  
16 significant impact on various aspects of outcome research. Perspectives of patients are  
17  
18 different from those of health professionals. Broad consensus exists that partners at  
19  
20 OMERACT have played a vital role in identifying domains relevant from the perspective of  
21  
22 patients and in developing new PROs such as fatigue, sleep quality, flares and work  
23  
24 productivity. Especially in the area of fatigue we have shown that patient involvement on  
25  
26 different levels and in different phases improves the quality of outcome research. By  
27  
28 combining evidence-based knowledge of researchers and the experiential knowledge of  
29  
30 patients, a synthesis of both kinds of knowledge has been achieved and documented. The  
31  
32 benefits are assessment tools that accurately measure what really matters to patients, are  
33  
34 formulated in understandable language and are user-friendly. Other benefits go beyond  
35  
36 improving clinical outcome research and include improved communication, mutual  
37  
38 empowerment, changed attitudes and substantial consequences outside OMERACT.  
39  
40  
41  
42  
43  
44

### 45 **Discussion**

46  
47 We set out to describe and evaluate the contribution of patients as partners in rheumatology  
48  
49 outcome research, reviewing their impact on the research agenda and the culture and process  
50  
51 of the OMERACT conference. The document analysis provided the recorded facts while the  
52  
53 interviews allowed an exploration of intentions, attitudes and perceived benefits or harms of  
54  
55 patient participation that complements the document analysis. Since validated methodologies  
56  
57  
58  
59  
60

1  
2  
3 for demonstrating impact of collaboration with patients in the context of research are lacking,  
4  
5 a responsive interview methodology seemed to be a good approach.  
6

7 Both strengths and limitations of this study relate to the personal experience of the first  
8 and last authors as participants in the developing process of patient partner participation.  
9  
10 Having witnessed the OMERACT process, actors and concerns of both the patient community  
11 and the research community was advantageous during the development of interview  
12 protocols, recruitment and selection of respondents and data analysis. For instance, the  
13 knowledge of the opinions of other participants made it possible to achieve maximum  
14 variation. Also, the active involvement in the support and training of partners created an  
15 adequate awareness of the relevant items to include in the study. The drawbacks of this  
16 engagement are the risks of subjectivity, blind spots and over- or under-identification with  
17 particular stakeholders. These risks have been addressed by applying strict quality measures  
18 for scientific rigor in qualitative, evaluation research.  
19  
20  
21  
22  
23  
24  
25  
26  
27  
28  
29  
30

31 The composition of the research team purposely included two external experts in  
32 qualitative research and a patient research partner, who were actively involved in the coding  
33 of interview transcripts and distilling relevant categories for impact, reduced the risk of  
34 subjectivity. Bias was avoided by the check-coding procedure in the analysis of the transcripts  
35 as at least two researchers independently coded each transcript, after which the whole team  
36 discussed the codes until consensus was reached. Saturation was also part of the discussion in  
37 the whole team. The inclusion of various stakeholder perspectives prevented one-sidedness.  
38  
39 No signals were identified to suggest that interviewees have simply given desirable answers,  
40 or just been friendly to the interviewer. Some interviewees have been rather critical, reporting  
41 several barriers for structural involvement of patients in research, but have always added  
42 constructive suggestions for improvement. Peer debriefing by an independent colleague (TA)  
43 further helped to prevent bias.  
44  
45  
46  
47  
48  
49  
50  
51  
52  
53  
54  
55  
56  
57  
58  
59  
60

1  
2  
3 Other limitations relate to the difficulties of demonstrating the ‘impact’ of patient  
4 involvement.<sup>9</sup> In OMERACT there is a strong belief that patient participation works, a belief  
5 that is nourished by the world-wide transition towards more patient-oriented health care and  
6 health research.<sup>79-82</sup> The assumption however that long term involvement of patients as equal  
7 partners guarantees sustainable inclusion of the patient perspective in outcome research  
8 complicates a thorough evaluation and makes it difficult to distinguish between expected,  
9 perceived and actual contributions. Many participants, not only partners, but also young  
10 researchers and other new-comers, are not able to identify their own contribution and may not  
11 see how their input is reflected in the final outcomes. Partners reported almost unanimously  
12 not being able to confirm substantial contributions during their participation but they believed  
13 they did. More experienced participants, mostly professionals, were less reluctant in reporting  
14 illustrative examples of patient contributions.  
15  
16  
17  
18  
19  
20  
21  
22  
23  
24  
25  
26  
27  
28

29 In a dialogue and consensus-based conference such as OMERACT many (f)actors  
30 contribute to the final outcomes. A linear causal relation between patient involvement and  
31 impact is therefore hard to establish; the processes of involvement are rather influenced by  
32 and influencing many (f)actors in a mutually interactive way. We found that when the level of  
33 involvement of partners increased from consultation to collaboration, it became harder to  
34 solely attribute individual or group contributions to the final outcomes. Because neither  
35 partners nor professionals act as a representative of any group or constituency it remains  
36 difficult to determine the influence of particular groups or individuals. Participation proved to  
37 be a dynamic process, especially when tasks were equally performed by patients and  
38 researchers, and when the dialogue between both took not only place during the official  
39 sessions, but also in the corridors of the conference. It should be noted that striving toward  
40 equality is a normative ideal,<sup>83</sup> and fighting inequalities between patients and professionals is  
41 and remains an ongoing concern. “Equality” may be seen in two ways: as the formal position  
42  
43  
44  
45  
46  
47  
48  
49  
50  
51  
52  
53  
54  
55  
56  
57  
58  
59  
60

1  
2  
3 of patients at the conference (as full delegates they had the same voting rights as professional  
4  
5 delegates, they received the same pre-conference materials and had access to all conference  
6  
7 sessions like all other participants) and as equality of partnership or collaboration in terms of  
8  
9 influence on the decision making process. Given the power inequalities between patients and  
10  
11 professionals the latter is the greater challenge, but nevertheless some of the documents and  
12  
13 interviews suggest it has been achieved to some extent. Although patients remain only  
14  
15 indirectly represented in the executive committee (the highest decision making body), our  
16  
17 data support the conclusion that a small number of experienced patients achieved an equal  
18  
19 relationship with researchers in their area of interest. They obtained the competences that  
20  
21 enabled them to perform all kinds of tasks at the conference similar to professionals, and  
22  
23 provided input that justified co-authorship of peer-reviewed articles. We did not obtain in-  
24  
25 depth information about the question to what extent power inequalities between patients and  
26  
27 researchers still persist but we know from the feedback of all respondents, including some  
28  
29 fellows and researchers that attended OMERACT for the first time, that some did not feel  
30  
31 treated equally. To what extent this experience was caused by their status of being a patient or  
32  
33 by the status of a new participant is still unknown.

34  
35  
36  
37  
38 A last obstacle for demonstrating the influence of patient participation is the invisibility  
39  
40 of experiential knowledge, often hidden in anecdotal stories. It has an impact that is rarely  
41  
42 claimed by patients nor perceived by professionals. Personal comments are normally not  
43  
44 reported because they are not seen as a valuable and valid source of knowledge<sup>84</sup> and yet  
45  
46 clear documentation of meetings is required to ensure that patients' contributions become  
47  
48 visible.<sup>85</sup> Professionals focus on synthesizing data and may not notice that the dialogue with  
49  
50 patients works like a reality check, generates new ideas or changes their beliefs, behaviour or  
51  
52 perception. When partners appear to simply agree with the results presented at OMERACT it  
53  
54 might look as if they do not have any contribution to make, but in fact they confirm the value  
55  
56  
57  
58  
59  
60



1  
2  
3 of the work under discussion and provide face validity to the process. It is for this reason that  
4  
5 most professionals appreciate the feedback and input from partners, although not all are aware  
6  
7 of this reason. Realizing the importance of such a reality check is beneficial for the  
8  
9 management of realistic expectations: do not expect innovative ideas, brilliant suggestions  
10  
11 and new concepts when inviting partners to join research. Their contributions are often more  
12  
13 subtle and need the attention of a modest and committed researcher to be noticed.  
14  
15

16 Despite these limitations, we believe that the results presented in this study are relevant  
17  
18 and valid. It is undeniable that there is a growing belief that patient involvement has been  
19  
20 successful and brought a unique added value to the conference. Even those who were  
21  
22 originally among the most skeptical participants now report that they have changed their  
23  
24 perception about the expected contribution of patient research partners. This study is  
25  
26 conducted within the context of a scientific research conference in the field of rheumatology,  
27  
28 a long term somatic condition. Our ability to generalize the findings is therefore limited and  
29  
30 extrapolation to other research contexts or to other conditions should be done with care.  
31  
32  
33  
34  
35  
36  
37  
38  
39  
40  
41  
42  
43  
44  
45  
46  
47  
48  
49  
50  
51  
52  
53  
54  
55  
56  
57  
58  
59  
60

## References

1. Keizer B, Bless R. Pilot study on the position of health consumer and patients' organisations in seven EU countries. Den Haag: ZonMW, 2010:54.
2. Involve. People & participation; How to put citizens at the heart of decision-making. London: Beacon Press, 2005.
3. Staley K. Summary Exploring Impact: Public involvement in NHS, public health and social care research. Eastleigh.: INVOLVE, 2009.
4. Wright MT, Roche B, von Unger H, et al. A call for an international collaboration on participatory research for health. *Health Promot Int* 2010;25(1):115-22.
5. Abma TA. Patients as partners in a health research agenda setting: the feasibility of a participatory methodology. *Eval Health Prof* 2006;29(4):424-39.
6. Abma TA, Nierse C, Widdershoven G. Patients as partners in responsive research: methodological notions for collaborations in mixed research teams. *Qualitative Health Research* 2009;19(3):401-15.
7. Abma TA, Broerse JE. Patient participation as dialogue: setting research agendas. *Health Expect* 2010;13(2):160-73.
8. Caron-Flinterman JF, Broerse JE, Bunders JF. The experiential knowledge of patients: a new resource for biomedical research? *Soc Sci Med* 2005;60(11):2575-84.
9. Staniszewska S, Haywood KL, Brett J, et al. Patient and public involvement in patient-reported outcome measures: evolution not revolution. *Patient* 2012;5(2):79-87.
10. Speight J, Barendse SM. FDA guidance on patient reported outcomes. *BMJ* 2010;340:c2921.
11. Rowen D, Carlton J, Brazier JE, et al. FDA on PROMs. Two important points. *BMJ* 2010;341:c5454.
12. Williamson PR, Altman DG, Blazeby JM, et al. The COMET (Core Outcome Measures in Effectiveness Trials) Initiative. *Trials* 2011;12 (Suppl 1)(A70).
13. Clarke M. Standardising outcomes for clinical trials and systematic reviews. *Trials* 2007;8:39.
14. Sinha IP, Smyth RL, Williamson PR. Using the Delphi technique to determine which outcomes to measure in clinical trials: Recommendations for the future based on a systematic review of existing studies. *PLoS Med* 2011;8(1).
15. Williamson P, Clarke M. The COMET (Core Outcome Measures in Effectiveness Trials) Initiative: Its Role in Improving Cochrane Reviews. *Cochrane Database Syst Rev* 2012;5:ED000041.
16. Saag KG. OMERACT 6 brings new perspectives to rheumatology measurement research. *J Rheumatol* 2003;30(4):639-41.
17. Heller JE, Shadick NA. Outcomes in rheumatoid arthritis: incorporating the patient perspective. *Current Opinion in Rheumatology* 2007;19(2):101-05.
18. OMERACT. Guiding principles for patient research partner participation in OMERACT. Accessed: October 18; 2012: Available from: <http://www.omeract.org/pdf/2011-03-27%20Agreed%20Patient%20Participation%20Policy.pdf>.
19. Guba EG, Lincoln YS. *Effective evaluation. Improving the usefulness of evaluation results through responsive and naturalistic approaches*. San Francisco: Jossey-Bass Publishers, 1988.
20. Abma TA, Widdershoven GAM. Evaluation as a relationally responsible practice. In: Denzin N, Lincoln Y, editors. *Handbook for Qualitative Inquiry*. Los Angeles: SAGE Publications Ltd., 2011:669-80.
21. Lincoln Y, Guba EG. *Naturalistic inquiry*. Newbury Park: SAGE, 1985.

22. Hewlett S, Carr M, Ryan S, et al. Outcomes generated by patients with rheumatoid arthritis: how important are they? *Musculoskeletal Care* 2005;3(3):131-42.
23. Hewlett S, Cockshott Z, Byron M, et al. Patients' perceptions of fatigue in rheumatoid arthritis: overwhelming, uncontrollable, ignored. *Arthritis and rheumatism* 2005;53(5):697-702.
24. Kirwan J, Heiberg T, Hewlett S, et al. Outcomes from the Patient Perspective Workshop at OMERACT 6. *Journal of Rheumatology* 2003;30(4):868-72.
25. de Wit MPT, Berlo SE, Aanerud GJ, et al. European League Against Rheumatism recommendations for the inclusion of patient representatives in scientific projects. *Annals of the Rheumatic Diseases* 2011;70(5):722-6.
26. Tugwell P, Boers M. OMERACT conference on outcome measures in rheumatoid arthritis clinical trials: introduction. *J Rheumatol* 1993;20(3):528-30.
27. Brooks PM, Boers M, Tugwell P. OMERACT III: the "ACT" revisited. *Jrn of Rheum* 1997;24(4):764-5.
28. Wells G, Anderson J, Beaton D, et al. Minimal clinically important difference module: summary, recommendations, and research agenda. *J Rheumatol* 2001;28(2):452-4.
29. Kirwan JR, Carr A, Gluck O, et al. Proposal for inclusion of a 'Patient's perceptions' module in OMERACT VI [unpublished], 2000.
30. Quest E, Aanerud GJ, Kaarud S, et al. Patients' perspective. *J Rheumatol* 2003;30(4):884-5.
31. Brooks PM, Tugwell P, Strand C, et al. OMERACT 6: International consensus conference on outcome measures in rheumatology: Introduction. *Jrn of Rheum* 2003;30(4):866-7.
32. Kirwan J. The patient perspective workshop at OMERACT 6: Rationale and methodology [unpublished preconference paper]. 2002.
33. Tugwell P, Boers M, Brooks P, et al. OMERACT: an international initiative to improve outcome measurement in rheumatology. *Trials* 2007;8:38.
34. Hewlett SA. Patients and clinicians have different perspectives on outcomes in arthritis. *J Rheumatol* 2003;30(4):877-9.
35. Leeb BF, Sautner J, Leeb BA, et al. Lack of agreement between patients' and physicians' perspectives of rheumatoid arthritis disease activity changes. *Scand J Rheumatol* 2006;35(6):441-6.
36. Kvien TK, Heiberg T. Patient perspective in outcome assessments--perceptions or something more? *J Rheumatol* 2003;30(4):873-6.
37. Carr A, Hewlett S, Hughes R, et al. Rheumatology outcomes: the patient's perspective. *Journal of Rheumatology* 2003;30(4):880-3.
38. Ahlmen M, Nordenskiold U, Archenholtz B, et al. Rheumatology outcomes: the patient's perspective. A multicentre focus group interview study of Swedish rheumatoid arthritis patients. *Rheumatology (Oxford)* 2005;44(1):105-10.
39. Rupp I, Boshuizen HC, Roorda LD, et al. Course of patient-reported health outcomes in rheumatoid arthritis: comparison of longitudinal and cross-sectional approaches. *J Rheumatol* 2006;33(2):228-33.
40. Gossec L, Paternotte S, Aanerud GJ, et al. Finalisation and validation of the rheumatoid arthritis impact of disease score, a patient-derived composite measure of impact of rheumatoid arthritis: a EULAR initiative. *Annals of the Rheumatic Diseases* 2011;70(6):935-42.
41. Hewlett S, Cockshott Z, Byron M, et al. Patients' perceptions of fatigue in rheumatoid arthritis: overwhelming, uncontrollable, ignored. *Arthritis Rheum* 2005;53(5):697-702.
42. Rupp I, Boshuizen HC, Jacobi CE, et al. Impact of fatigue on health-related quality of life in rheumatoid arthritis. *Arthritis Rheum* 2004;51(4):578-85.

- 1
  - 2
  - 3
  - 4
  - 5
  - 6
  - 7
  - 8
  - 9
  - 10
  - 11
  - 12
  - 13
  - 14
  - 15
  - 16
  - 17
  - 18
  - 19
  - 20
  - 21
  - 22
  - 23
  - 24
  - 25
  - 26
  - 27
  - 28
  - 29
  - 30
  - 31
  - 32
  - 33
  - 34
  - 35
  - 36
  - 37
  - 38
  - 39
  - 40
  - 41
  - 42
  - 43
  - 44
  - 45
  - 46
  - 47
  - 48
  - 49
  - 50
  - 51
  - 52
  - 53
  - 54
  - 55
  - 56
  - 57
  - 58
  - 59
  - 60
43. Repping-Wuts H, Uitterhoeve R, van Riel P, et al. Fatigue as experienced by patients with rheumatoid arthritis (RA): A qualitative study. *Intl J Nursing Studies* 2008;8(45(7)):995-102.
44. Nikolaus S, Bode C, Taal E, et al. Four different patterns of fatigue in rheumatoid arthritis patients: results of a Q-sort study. *Rheumatology* 2010;49(11):2191-9.
45. Hewlett S, Hehir M, Kirwan JR. Measuring fatigue in rheumatoid arthritis: a systematic review of scales in use. *Arthritis & Rheumatism* 2007;57(3):429-39.
46. Kirwan JR, Hewlett S. Patient perspective: reasons and methods for measuring fatigue in rheumatoid arthritis. *J Rheumatol* 2007;34(5):1171-3.
47. Hewlett S, Chalder T, Choy E, et al. Fatigue in rheumatoid arthritis: time for a conceptual model. *Rheumatology (Oxford)* 2010.
48. Kirwan JR, Minnock P, Adebajo A, et al. Patient perspective: fatigue as a recommended patient centered outcome measure in rheumatoid arthritis. *J Rheumatol* 2007;34(5):1174-7.
49. Pincus T, Sokka T. Complexities in the quantitative assessment of patients with rheumatic diseases in clinical trials and clinical care. *Clin Exp Rheumatol* 2005;23(5 Suppl 39):S1-9.
50. Kirwan JR, Minnock P, Adebajo A, et al. Patient perspective: fatigue as a recommended patient centered outcome measure in rheumatoid arthritis. *Journal of Rheumatology* 2007;34(5):1174-7.
51. Nicklin J, Cramp F, Kirwan J, et al. Measuring fatigue in rheumatoid arthritis: A cross-sectional study to evaluate the Bristol Rheumatoid Arthritis Fatigue Multi-Dimensional questionnaire, visual analog scales, and numerical rating scales. *Arthritis Care Res (Hoboken)* 2010;62(11):1559-68.
52. Nikolaus S, van de Laar MA. Measuring fatigue in rheumatoid arthritis. *Nat Rev Rheumatol* 2011;7(10):562-4.
53. Repping-Wuts H. Fatigue in patients with rheumatoid arthritis (thesis). Nijmegen University, 2009.
54. Wolfe F, Hawley DJ, Wilson K. The prevalence and meaning of fatigue in rheumatic disease. *The Journal of rheumatology* 1996;23(8):1407-17.
55. Tack BB. Fatigue in rheumatoid arthritis. Conditions, strategies, and consequences. *Arthritis Care & Research* 1990;3(2):65-70.
56. Crosby LJ. Factors which contribute to fatigue associated with rheumatoid arthritis. *J Adv Nurs* 1991;16(8):974-81.
57. Garrett S, Jenkinson T, Kennedy LG, et al. A new approach to defining disease status in ankylosing spondylitis: the Bath Ankylosing Spondylitis Disease Activity Index. *The Journal of rheumatology* 1994;21(12):2286-91.
58. Newman SP. Psychosocial measures in musculoskeletal trials. *J Rheumatol* 1997;24(5):979-84.
59. Brooks P, McFarlane AC, Newman S, et al. Psychosocial measures. *J Rheumatol* 1997;24(5):1008-11.
60. Gladman DD, Mease PJ, Strand V, et al. Consensus on a core set of domains for psoriatic arthritis. *The Journal of rheumatology* 2007;34(5):1167-70.
61. Mease P, Arnold LM, Choy EH, et al. Fibromyalgia syndrome module at OMERACT 9: domain construct. *The Journal of rheumatology* 2009;36(10):2318-29.
62. Choy EH, Arnold LM, Clauw DJ, et al. Content and criterion validity of the preliminary core dataset for clinical trials in fibromyalgia syndrome. *The Journal of rheumatology* 2009;36(10):2330-4.

63. Taylor WJ, Schumacher HR, Jr., Baraf HS, et al. A modified Delphi exercise to determine the extent of consensus with OMERACT outcome domains for studies of acute and chronic gout. *Annals of the rheumatic diseases* 2008;67(6):888-91.
64. Merkel PA, Aydin SZ, Boers M, et al. The OMERACT core set of outcome measures for use in clinical trials of ANCA-associated vasculitis. *The Journal of rheumatology* 2011;38(7):1480-6.
65. van Tuyl LH, Smolen JS, Wells GA, et al. Patient perspective on remission in rheumatoid arthritis. *The Journal of rheumatology* 2011;38(8):1735-8.
66. Boers M, Brooks P, Strand CV, et al. The OMERACT filter for Outcome Measures in Rheumatology. *The Journal of rheumatology* 1998;25(2):198-9.
67. Lassere MN, Johnson KR, Boers M, et al. Standardized assessment of adverse events in rheumatology clinical trials: summary of the OMERACT 7 drug safety module update. *Journal of Rheumatology* 2005;32(10):2037-41.
68. Bingham CO, 3rd, Alten R, de Wit MP. The importance of patient participation in measuring rheumatoid arthritis flares. *Annals of the rheumatic diseases* 2012.
69. Kristjansson E, Tugwell PS, Wilson AJ, et al. Development of the effective musculoskeletal consumer scale. *The Journal of rheumatology* 2007;34(6):1392-400.
70. de Wit MPT, Koelewijn-van Loon MS, Collins S, et al. How patients contribute a new voice at a scientific conference: their expectations and experiences at the Outcome Measures in Rheumatology Conference 2010. (*forthcoming*) 2012.
71. Abma TA, Nierse CJ, Widdershoven GA. Patients as partners in responsive research: methodological notions for collaborations in mixed research teams. *Qual Health Res* 2009;19(3):401-15.
72. Kjekken I, Ziegler C, Skrolsvik J, et al. How to develop patient-centered research: some perspectives based on surveys among people with rheumatic diseases in Scandinavia. *Physical Therapy* 2010;90(3):450-60.
73. Akerhielm CE. Patient participation in research - A Swedish model. *Ann Rheum Dis* 2009;68(Suppl3):800.
74. Akerhielm CE. Patient research partners - A way to participation and influence in research. *Ann Rheum Dis* 2010;69(Suppl3):753.
75. Hewlett S. Learnings from the Bristol experience - Practicalities of a decade of patient involvement in research on a local level. *Ann Rheum Dis* 2010;69((Suppl3)):29.
76. Hewlett S, De Wit M, Richards P, Quest E, Hughes R, Heiberg T, et al. Patients and professionals as research partners: challenges, practicalities, and benefits. *Arthritis & Rheumatism* 2006;55(4):676-80.
77. Gossec L, Dougados M, Rinceval N, et al. Elaboration of the preliminary Rheumatoid Arthritis Impact of Disease (RAID) score: a EULAR initiative. *Annals of the Rheumatic Diseases* 2009;68(11):1680-5.
78. Stiggelbout AM, Weijden TV, Wit MP, et al. Shared decision making: really putting patients at the centre of healthcare. *BMJ* 2012;344:e256.
79. Beresford P. User involvement, research and health inequalities: developing new directions. *Health Soc Care Community* 2007;15(4):306-12.
80. Ward PR, Thompson J, Barber R, et al. Critical perspectives on 'consumer involvement' in health research: Epistemological dissonance and the know-do gap. *Journal of Sociology* 2009;46(1):63-82.
81. Lindenmeyer A, Hearnshaw H, Sturt J, et al. Assessment of the benefits of user involvement in health research from the Warwick Diabetes Care Research User Group: a qualitative case study. *Health Expectations* 2007;10(3):268-77.
82. Broerse JEW, Elberse JE, Caron-Flinterman JFW, et al. Enhancing a transition towards a needs-oriented health research system. In: Broerse JEW, Bunders JFG, editors.

- 1  
2  
3  
4  
5  
6  
7  
8  
9  
10  
11  
12  
13  
14  
15  
16  
17  
18  
19  
20  
21  
22  
23  
24  
25  
26  
27  
28  
29  
30  
31  
32  
33  
34  
35  
36  
37  
38  
39  
40  
41  
42  
43  
44  
45  
46  
47  
48  
49  
50  
51  
52  
53  
54  
55  
56  
57  
58  
59  
60
- Transitions in Health Systems: Dealing with persistent problems.* Amsterdam: VU University Press, 2010:181-205.
83. Habermas J. *Theorie des kommunikativen Handelns. Bd. 1. Handlungsrationalität und gesellschaftliche Rationalisierung* Zweite Auflage 1982 ed. Frankfurt am Main: Suhrkamp, 1981.
84. Schipper K. Patient participation & knowledge [thesis]. VU University, 2011.
85. Jinks C, Ong BN, O'Neill TJ. The Keele community knee pain forum: action research to engage with stakeholders about the prevention of knee pain and disability. *BMC Musculoskelet Disord* 2009;10:85.

For peer review only

1  
2  
3  
4  
5  
6  
7  
8  
9  
10  
11  
12  
13  
14  
15  
16  
17  
18  
19  
20  
21  
22  
23  
24  
25  
26  
27  
28  
29  
30  
31  
32  
33  
34  
35  
36  
37  
38  
39  
40  
41  
42  
43  
44  
45  
46  
47  
48  
49

Table 1 Characteristics interviewees

|                                      | Professionals                                                                     | Patient Research Partners                                                                       | Interview Code |
|--------------------------------------|-----------------------------------------------------------------------------------|-------------------------------------------------------------------------------------------------|----------------|
| Sex (M:F)                            | 12 : 4                                                                            | 7 : 9                                                                                           |                |
| Professional background or Diagnosis | 10 practicing rheumatologists<br>3 full time researchers<br>3 other professionals | 10 rheumatoid arthritis<br>2 vasculitis<br>2 ankylosing spondylitis<br>1 fibromyalgia<br>1 gout |                |
| Number of                            | 1                                                                                 | 5                                                                                               | 8              |
| OMERACT conferences attended         | 2                                                                                 | 0                                                                                               | 3              |
|                                      | 3                                                                                 | 1                                                                                               | 1              |
|                                      | 4                                                                                 | 4                                                                                               | 4              |
|                                      | ≥5                                                                                | 6                                                                                               | 0              |
| Interview in relation to             | Before                                                                            | 2                                                                                               | 1              |
|                                      | During                                                                            | 8                                                                                               | 16             |

} PG to PN

1  
2  
3  
4  
5  
6  
7  
8  
9  
10  
11  
12  
13  
14  
15  
16  
17  
18  
19  
20  
21  
22  
23  
24  
25  
26  
27  
28  
29  
30  
31  
32  
33  
34  
35  
36  
37  
38  
39  
40  
41  
42  
43  
44  
45  
46  
47  
48  
49

OMERACT

| conference          | After | 6                           | 5                           |
|---------------------|-------|-----------------------------|-----------------------------|
| Geographical spread |       | 6 countries<br>2 continents | 7 countries<br>4 continents |
| Research            |       | 10 Senior Researchers       | RA to RG, RJ, RK, RY        |
| Background          |       | 1 Research Fellow           | RH                          |
|                     |       | 1 Post-doctoral researcher  | RI                          |
|                     |       | 2 Pharma representatives    | DA, DD                      |
|                     |       | 2 Staff members             | DB, DC                      |

For Peer review only



Table 2

Main and sub-categories from the analysis of patient contributions to OMERACT meetings and outcome research since 2002

| IMPACT OF A DECADE OF PATIENT INVOLVEMENT IN OMERACT                                                                                                                                                                        |                                                                                                                                                                                                                                                                 |                                                                                                                                                                                                                                    |                                                                                                                                                                                                    |                                                                                                                                                                            |
|-----------------------------------------------------------------------------------------------------------------------------------------------------------------------------------------------------------------------------|-----------------------------------------------------------------------------------------------------------------------------------------------------------------------------------------------------------------------------------------------------------------|------------------------------------------------------------------------------------------------------------------------------------------------------------------------------------------------------------------------------------|----------------------------------------------------------------------------------------------------------------------------------------------------------------------------------------------------|----------------------------------------------------------------------------------------------------------------------------------------------------------------------------|
| Research Agenda                                                                                                                                                                                                             | Outcome core sets                                                                                                                                                                                                                                               | Patient reported outcomes                                                                                                                                                                                                          | Culture of OMERACT                                                                                                                                                                                 | Consequences outside OMERACT                                                                                                                                               |
| Generating challenging ideas<br><br>Identification of patient-relevant research topics:<br><ul style="list-style-type: none"> <li>• Well being</li> <li>• Fatigue</li> <li>• Sleep disturbance</li> <li>• Flares</li> </ul> | Identification of patient relevant domains to include in core sets for clinical trials:<br><ul style="list-style-type: none"> <li>• Fibromyalgia</li> <li>• Psoriatic Arthritis</li> <li>• Vasculitis</li> <li>• Gout</li> <li>• MRI</li> <li>• MCID</li> </ul> | Acceptable, understandable and feasible outcome measures for<br><ul style="list-style-type: none"> <li>• Monitoring adverse events</li> <li>• Work productivity</li> <li>• Flares</li> <li>• Psychosocial interventions</li> </ul> | <ul style="list-style-type: none"> <li>• Attitudes</li> <li>• Communication</li> <li>• Perceptions</li> <li>• Motivation</li> <li>• Relational empowerment</li> <li>• Personal benefits</li> </ul> | <ul style="list-style-type: none"> <li>• Local initiatives</li> <li>• Local and national networks of partners</li> <li>• EULAR</li> <li>• COMET</li> <li>• ISDM</li> </ul> |

1  
2  
3  
4  
5  
6  
7  
8  
9  
10  
11  
12  
13  
14  
15  
16  
17  
18  
19  
20  
21  
22  
23  
24  
25  
26  
27  
28  
29  
30  
31  
32  
33  
34  
35  
36  
37  
38  
39  
40  
41  
42  
43  
44  
45  
46  
47  
48  
49  
50  
51  
52  
53  
54  
55  
56  
57  
58  
59  
60

|               |                                                               |  |  |  |
|---------------|---------------------------------------------------------------|--|--|--|
|               | <ul style="list-style-type: none"> <li>• Remission</li> </ul> |  |  |  |
| Reality check |                                                               |  |  |  |

For peer review only

## Abbreviations

|         |                                               |
|---------|-----------------------------------------------|
| COMET   | Core Outcome Measures in Effectiveness Trials |
| EULAR   | European League Against Rheumatism            |
| FDA     | USA Food and Drug Administration              |
| ISDM    | International Shared Decision Making          |
| MCID    | Minimal Clinically Important Difference       |
| MRI     | Magnetic Resonance Imaging                    |
| OMERACT | Outcome Measurement in Rheumatology           |
| PRO     | Patient Reported Outcome                      |
| RA      | Rheumatoid Arthritis                          |
